# Supplementary material for: Treating lung cancer with dynamic conformal arc therapy: a dosimetric study
Source: Springer Nature journal article supplement (doi:10.1186/s13014-017-0823-y), 2017-06-02
Supplement: MOESM1 [file 12335584]

Primož Peterlin, Karmen Stanič, Ignasi Méndez, Andrej Strojnik (2017). Treating lung cancer with dynamic conformal arc therapy: a dosimetric study. Radiation Oncology  
doi:10.1186/s13014-017-0823-y

## Supplementary data

### Dose volume histograms

Cumulative dose volume histograms (DVHs) for the 35 patient cases in this study are presented separately for each treatment plan (conventional 3D CRT and DCAT). The colors used in DVH for denoting a given structure conform to the palette below. Note that not all structures were contoured in every case.

|                  |             |
|------------------|-------------|
| GTV              | dark red    |
| CTV              | red         |
| PTV              | blue        |
| lung             | magenta     |
| heart            | cyan        |
| spinal cord      | yellow      |
| spinal cord PORV | dark yellow |
| esophagus        | maroon      |
| liver            | green       |

In the table, the volume is given for each structure, as well as several dosimetric parameters (all in cGy): minimum and maximum point dose contained within the structure, median dose to the structure, mean dose to the structure, and the standard deviation of dose to the structure.

## Case 1

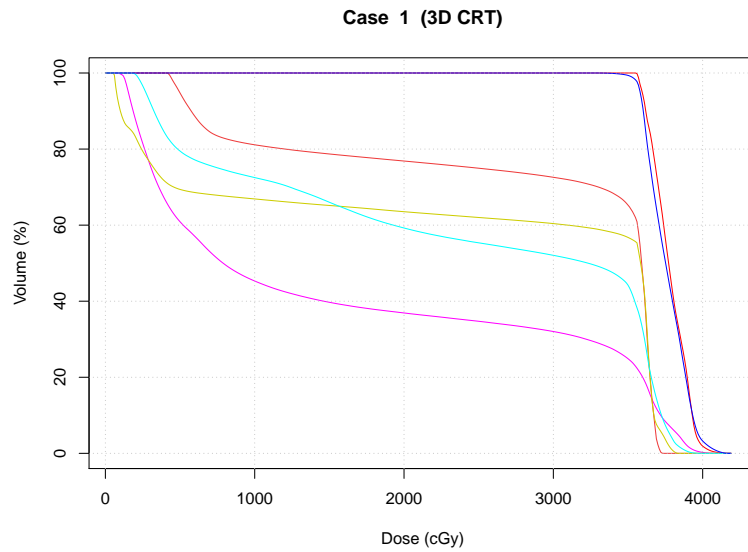

| Structure   | V [cm3] | Dmin   | Dmax   | Dmedian | Dmean  | Dstd   |
|-------------|---------|--------|--------|---------|--------|--------|
| CTV         | 138.9   | 3548.5 | 4194.9 | 3771.9  | 3777.7 | 116.7  |
| lung        | 2794.7  | 61.8   | 4109.8 | 788.4   | 1617.0 | 1481.6 |
| esophagus   | 28.3    | 407.5  | 3735.0 | 3591.2  | 2891.7 | 1212.0 |
| spinal cord | 27.4    | 56.2   | 3839.1 | 3584.3  | 2393.8 | 1581.8 |
| heart       | 725.9   | 153.0  | 3975.4 | 3232.2  | 2373.8 | 1405.3 |
| PTV         | 533.8   | 3270.2 | 4194.9 | 3751.9  | 3761.5 | 130.8  |

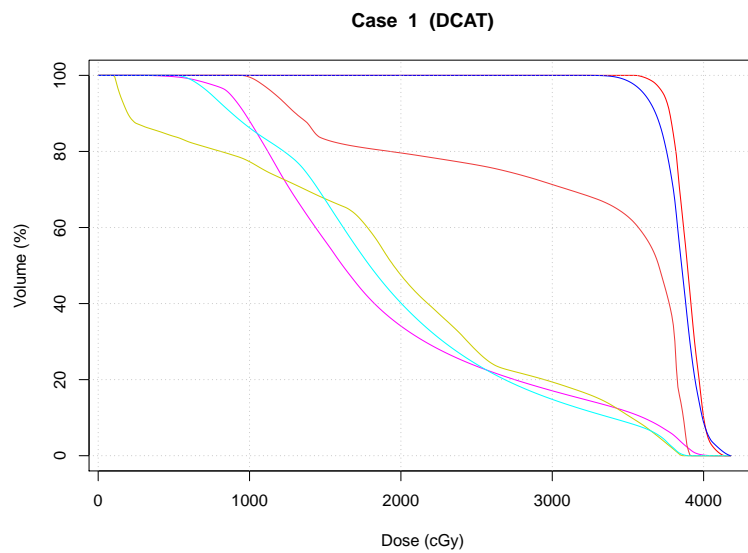

| Structure   | V [cm3] | Dmin   | Dmax   | Dmedian | Dmean  | Dstd   |
|-------------|---------|--------|--------|---------|--------|--------|
| CTV         | 138.9   | 3534.6 | 4140.5 | 3892.6  | 3889.2 | 91.7   |
| lung        | 2794.7  | 206.5  | 4088.0 | 1615.1  | 1905.0 | 926.1  |
| esophagus   | 28.3    | 938.5  | 3916.2 | 3703.5  | 3138.4 | 985.5  |
| spinal cord | 27.4    | 103.0  | 3861.8 | 1951.5  | 1913.8 | 1091.2 |
| heart       | 725.9   | 495.1  | 3908.3 | 1793.4  | 1957.0 | 860.1  |
| PTV         | 533.8   | 3190.1 | 4186.0 | 3854.6  | 3845.3 | 127.4  |

## Case 2

Case 2 (3D CRT)

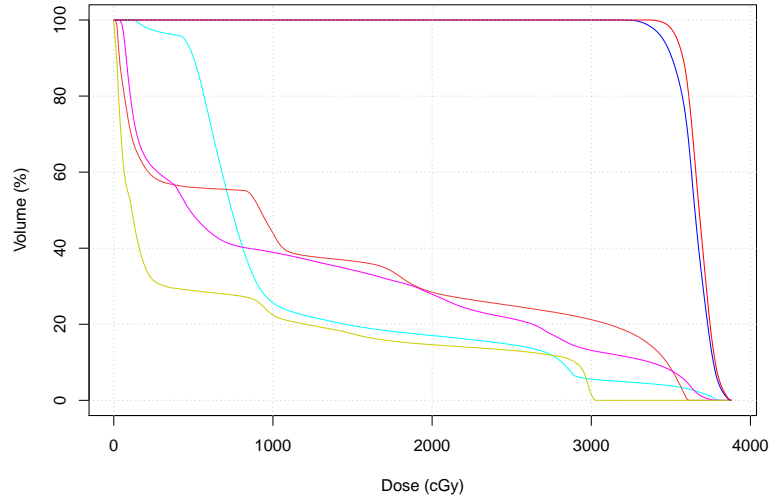

| Structure   | V [cm3] | Dmin   | Dmax   | Dmedian | Dmean  | Dstd   |
|-------------|---------|--------|--------|---------|--------|--------|
| heart       | 546.9   | 108.5  | 3830.1 | 741.1   | 1112.6 | 898.6  |
| esophagus   | 35.5    | 11.9   | 3614.2 | 920.2   | 1286.5 | 1322.8 |
| lung        | 4993.9  | 27.3   | 3824.2 | 477.2   | 1158.2 | 1248.0 |
| spinal cord | 54.1    | 0.0    | 3028.5 | 113.4   | 641.8  | 1001.3 |
| PTV         | 519.1   | 3112.0 | 3882.6 | 3650.5  | 3644.0 | 103.4  |
| CTV         | 323.4   | 3352.9 | 3882.6 | 3677.5  | 3677.0 | 80.7   |

Case 2 (DCAT)

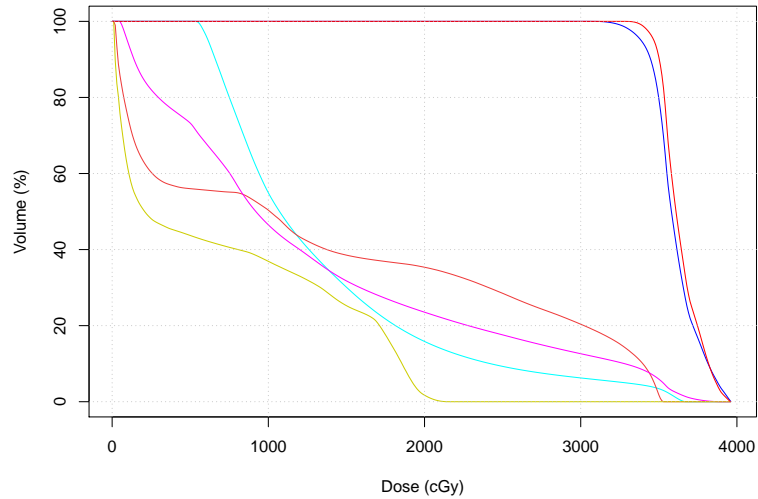

| Structure   | V [cm3] | Dmin   | Dmax   | Dmedian | Dmean  | Dstd   |
|-------------|---------|--------|--------|---------|--------|--------|
| heart       | 546.9   | 506.7  | 3675.0 | 1071.9  | 1342.1 | 757.5  |
| esophagus   | 35.5    | 17.0   | 3529.8 | 1010.4  | 1356.1 | 1318.9 |
| lung        | 4993.9  | 47.2   | 3910.5 | 919.9   | 1285.4 | 1083.1 |
| spinal cord | 54.1    | 10.4   | 2148.7 | 208.1   | 711.2  | 756.0  |
| PTV         | 519.1   | 3011.4 | 3967.1 | 3580.8  | 3602.7 | 143.5  |
| CTV         | 323.4   | 3274.5 | 3964.3 | 3610.0  | 3634.1 | 121.9  |

### Case 3

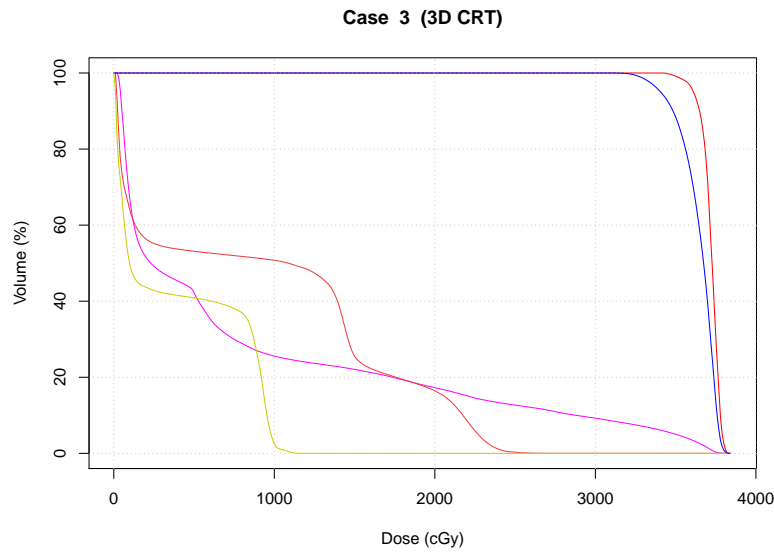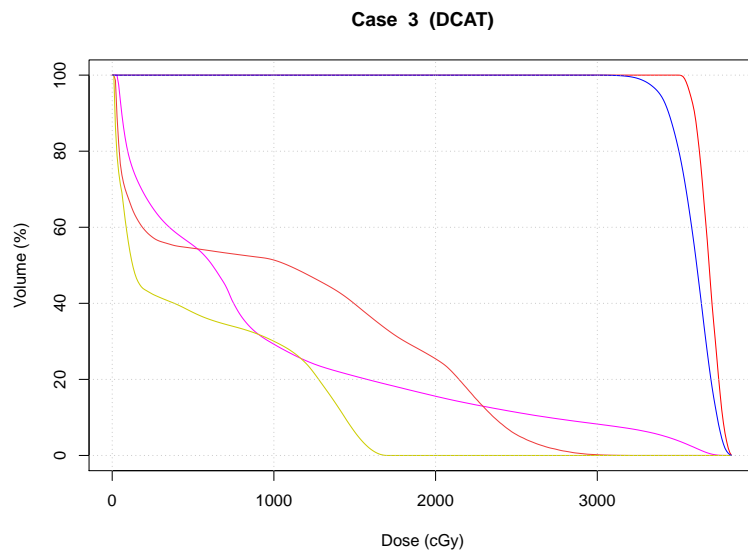

## Case 4

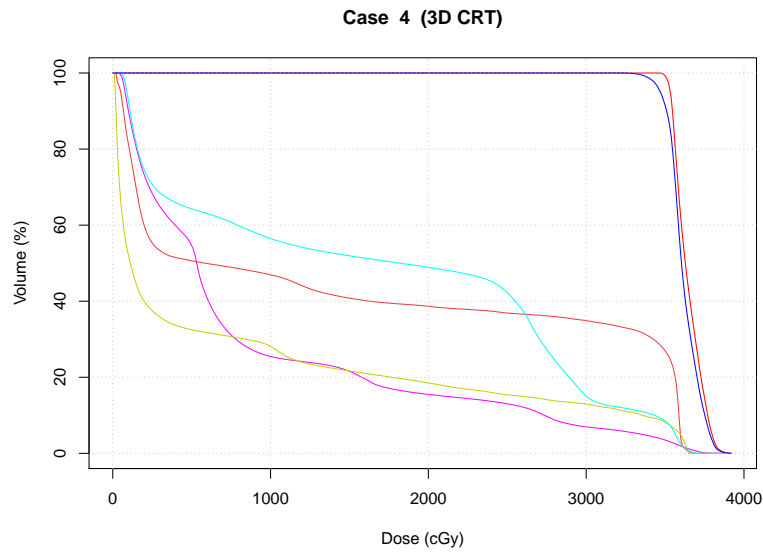

| Structure   | V [cm3] | Dmin   | Dmax   | Dmedian | Dmean  | Dstd   |
|-------------|---------|--------|--------|---------|--------|--------|
| CTV         | 285.8   | 3434.9 | 3922.7 | 3628.5  | 3644.7 | 85.1   |
| lung        | 3778.3  | 28.5   | 3865.3 | 532.2   | 896.0  | 1002.5 |
| esophagus   | 39.3    | 19.1   | 3681.8 | 582.0   | 1534.3 | 1557.3 |
| spinal cord | 52.9    | 6.4    | 3656.4 | 111.4   | 812.7  | 1218.3 |
| heart       | 585.1   | 51.7   | 3717.3 | 1821.4  | 1648.0 | 1304.3 |
| PTV         | 516.9   | 3186.7 | 3922.7 | 3603.8  | 3617.4 | 95.2   |

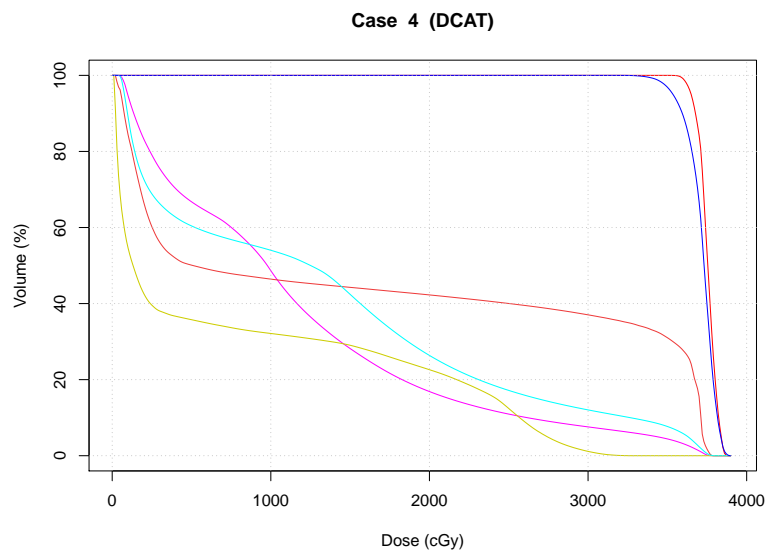

| Structure   | V [cm3] | Dmin   | Dmax   | Dmedian | Dmean  | Dstd   |
|-------------|---------|--------|--------|---------|--------|--------|
| CTV         | 285.8   | 3508.0 | 3879.2 | 3755.0  | 3752.4 | 55.9   |
| lung        | 3778.3  | 26.4   | 3822.6 | 978.2   | 1150.1 | 967.4  |
| esophagus   | 39.3    | 22.5   | 3784.5 | 509.5   | 1646.2 | 1621.8 |
| spinal cord | 52.9    | 9.9    | 3267.0 | 131.5   | 806.7  | 1046.3 |
| heart       | 585.1   | 44.2   | 3796.3 | 1250.9  | 1313.5 | 1159.7 |
| PTV         | 516.9   | 3179.7 | 3906.1 | 3731.6  | 3716.5 | 91.0   |

## Case 5

Case 5 (3D CRT)

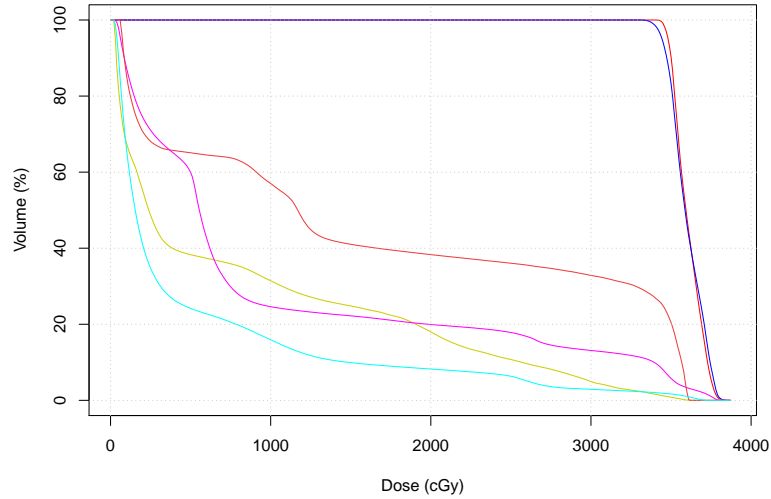

| Structure   | V [cm3] | Dmin   | Dmax   | Dmedian | Dmean  | Dstd   |
|-------------|---------|--------|--------|---------|--------|--------|
| CTV         | 335.6   | 3397.0 | 3849.9 | 3593.2  | 3604.7 | 86.3   |
| PTV         | 617.6   | 3295.9 | 3879.4 | 3587.5  | 3600.0 | 102.4  |
| spinal cord | 30.6    | 24.0   | 3625.1 | 238.8   | 823.5  | 1020.1 |
| lung        | 2829.1  | 25.2   | 3862.4 | 554.5   | 1002.3 | 1150.1 |
| esophagus   | 35.3    | 60.8   | 3617.1 | 1168.9  | 1638.9 | 1432.9 |
| heart       | 837.1   | 20.2   | 3737.0 | 154.3   | 506.6  | 805.1  |

Case 5 (DCAT)

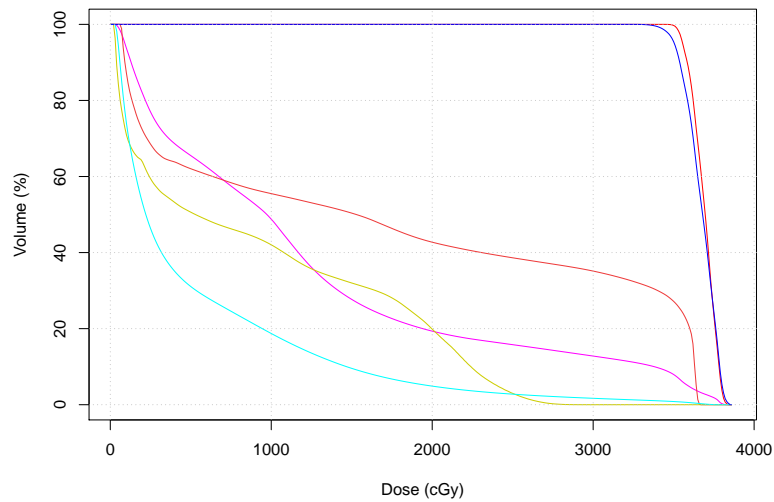

| Structure   | V [cm3] | Dmin   | Dmax   | Dmedian | Dmean  | Dstd   |
|-------------|---------|--------|--------|---------|--------|--------|
| lung        | 2829.1  | 21.6   | 3839.4 | 973.0   | 1212.2 | 1099.2 |
| CTV         | 335.6   | 3443.6 | 3849.2 | 3696.2  | 3688.4 | 73.7   |
| esophagus   | 35.3    | 65.2   | 3664.0 | 1528.8  | 1740.4 | 1492.4 |
| spinal cord | 30.6    | 25.1   | 2965.8 | 529.1   | 923.4  | 893.5  |
| heart       | 837.1   | 27.8   | 3771.4 | 220.7   | 534.7  | 691.4  |
| PTV         | 617.6   | 3245.7 | 3861.2 | 3679.9  | 3670.2 | 95.4   |

## Case 6

Case 6 (3D CRT)

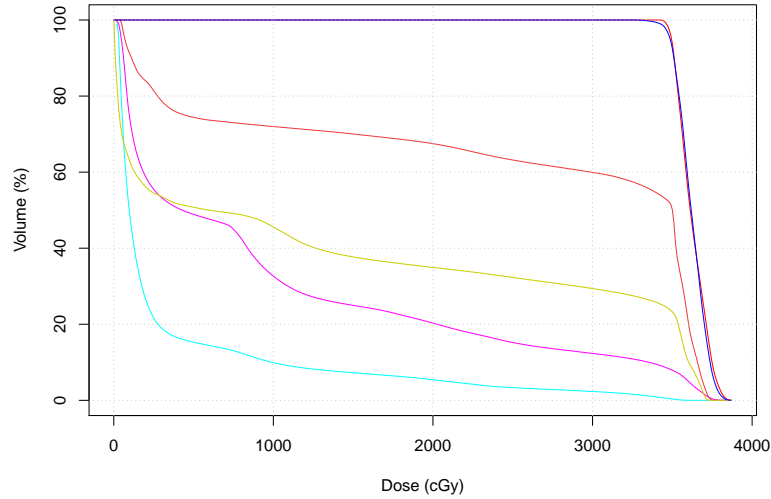

| Structure   | V [cm3] | Dmin   | Dmax   | Dmedian | Dmean  | Dstd   |
|-------------|---------|--------|--------|---------|--------|--------|
| heart       | 581.2   | 22.7   | 3607.0 | 96.9    | 349.7  | 680.0  |
| CTV         | 600.6   | 3421.1 | 3872.5 | 3612.2  | 3623.7 | 90.1   |
| lung        | 4319.4  | 8.0    | 3839.0 | 429.3   | 1000.4 | 1174.6 |
| esophagus   | 27.4    | 44.4   | 3769.3 | 3500.6  | 2446.8 | 1476.9 |
| spinal cord | 49.7    | 0.0    | 3732.3 | 597.6   | 1402.5 | 1525.5 |
| PTV         | 1129.0  | 3228.3 | 3872.5 | 3618.5  | 3620.9 | 87.6   |

Case 6 (DCAT)

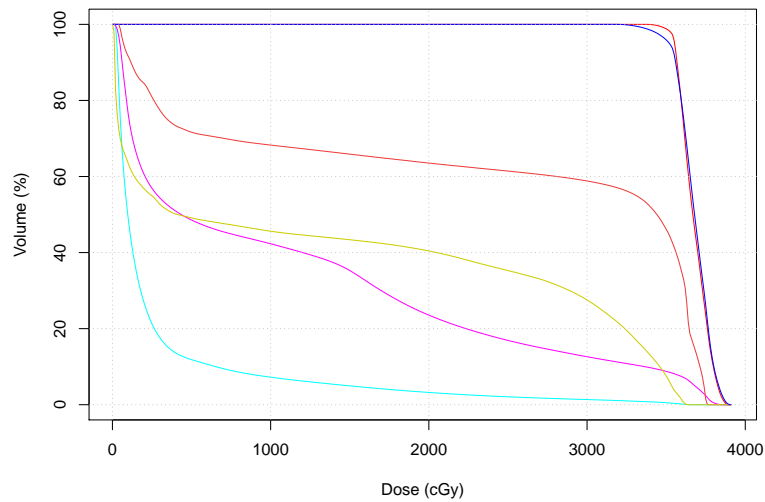

| Structure   | V [cm3] | Dmin   | Dmax   | Dmedian | Dmean  | Dstd   |
|-------------|---------|--------|--------|---------|--------|--------|
| heart       | 581.2   | 21.0   | 3677.3 | 96.9    | 285.4  | 564.6  |
| CTV         | 600.6   | 3376.0 | 3904.1 | 3668.4  | 3676.5 | 87.8   |
| lung        | 4319.4  | 8.5    | 3877.9 | 434.8   | 1128.0 | 1227.9 |
| esophagus   | 27.4    | 42.0   | 3766.0 | 3441.3  | 2376.3 | 1536.4 |
| spinal cord | 49.7    | 8.5    | 3639.2 | 412.0   | 1407.2 | 1469.7 |
| PTV         | 1129.0  | 3175.5 | 3914.7 | 3679.4  | 3676.9 | 101.8  |

## Case 7

Case 7 (3D CRT)

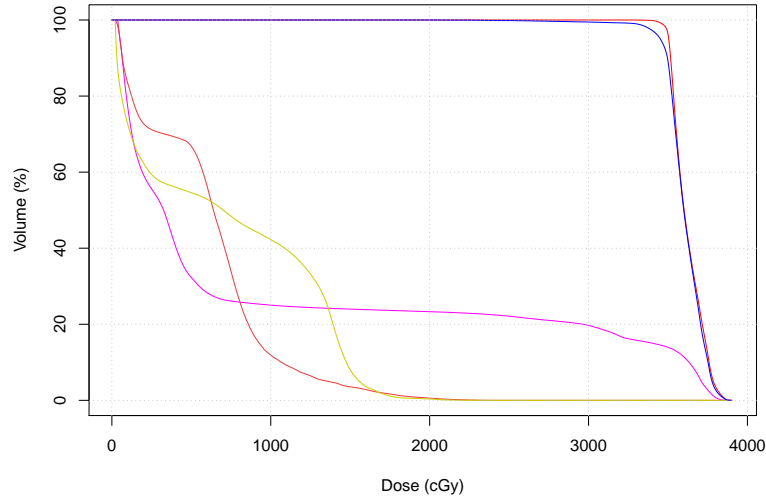

| Structure   | V [cm3] | Dmin   | Dmax   | Dmedian | Dmean  | Dstd   |
|-------------|---------|--------|--------|---------|--------|--------|
| CTV         | 396.0   | 3246.5 | 3882.5 | 3601.5  | 3621.8 | 93.7   |
| lung        | 2713.0  | 12.0   | 3894.1 | 325.6   | 998.9  | 1359.0 |
| esophagus   | 30.0    | 36.0   | 2430.7 | 639.3   | 604.4  | 415.6  |
| spinal cord | 44.1    | 19.6   | 2362.8 | 700.9   | 727.4  | 610.4  |
| PTV         | 873.0   | 1960.8 | 3901.5 | 3599.3  | 3605.2 | 127.2  |

Case 7 (DCAT)

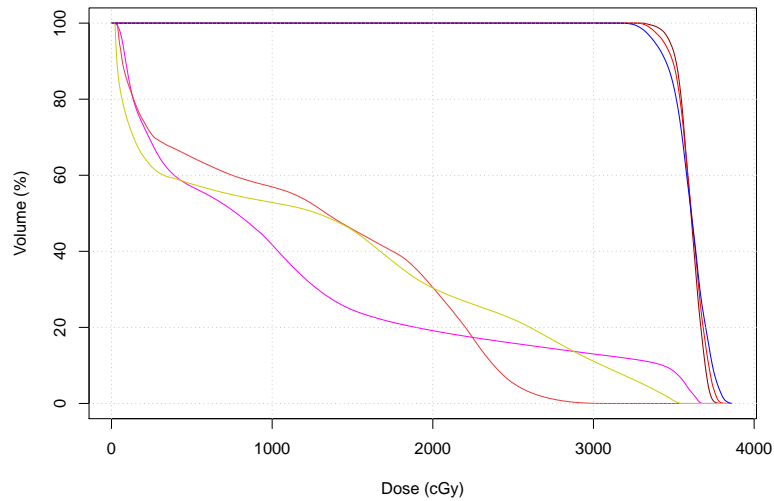

| Structure   | V [cm3] | Dmin   | Dmax   | Dmedian | Dmean  | Dstd   |
|-------------|---------|--------|--------|---------|--------|--------|
| GTV         | 171.7   | 3297.8 | 3800.9 | 3606.9  | 3603.4 | 73.2   |
| CTV         | 396.0   | 3266.8 | 3831.1 | 3610.3  | 3605.0 | 90.3   |
| lung        | 2713.0  | 14.1   | 3690.0 | 778.1   | 1105.9 | 1133.0 |
| esophagus   | 30.0    | 35.3   | 3063.3 | 1336.8  | 1231.1 | 926.5  |
| spinal cord | 44.1    | 20.7   | 3549.2 | 1279.4  | 1293.8 | 1182.7 |
| PTV         | 873.0   | 3129.4 | 3860.8 | 3608.3  | 3600.0 | 114.5  |

## Case 8

Case 8 (3D CRT)

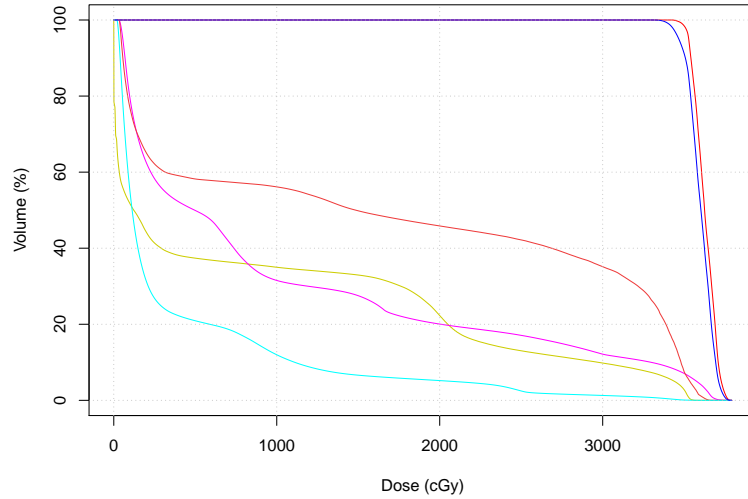

| Structure   | V [cm3] | Dmin   | Dmax   | Dmedian | Dmean  | Dstd   |
|-------------|---------|--------|--------|---------|--------|--------|
| spinal cord | 60.7    | 0.0    | 3584.1 | 122.8   | 898.5  | 1188.3 |
| CTV         | 174.0   | 3424.1 | 3792.1 | 3625.3  | 3626.9 | 64.1   |
| lung        | 2281.2  | 22.8   | 3770.2 | 496.3   | 1014.8 | 1173.2 |
| esophagus   | 33.6    | 34.3   | 3669.3 | 1485.1  | 1683.8 | 1476.0 |
| heart       | 810.3   | 17.2   | 3609.1 | 112.7   | 385.9  | 646.1  |
| PTV         | 448.6   | 3295.7 | 3792.1 | 3602.9  | 3600.0 | 74.5   |

Case 8 (DCAT)

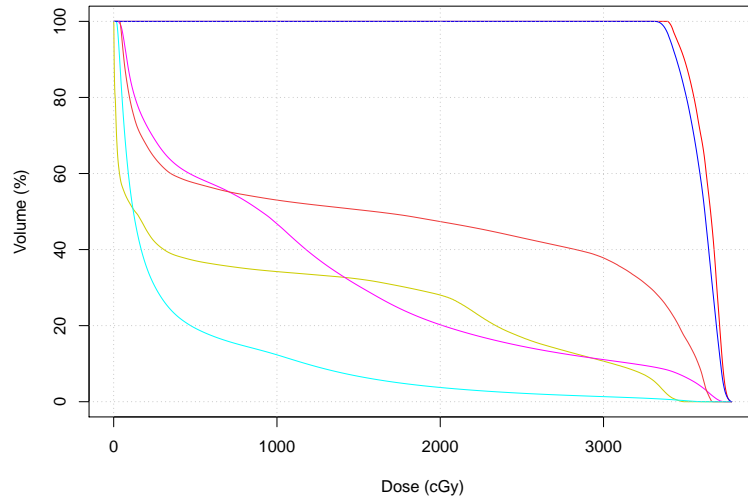

| Structure   | V [cm3] | Dmin   | Dmax   | Dmedian | Dmean  | Dstd   |
|-------------|---------|--------|--------|---------|--------|--------|
| spinal cord | 60.7    | 0.6    | 3503.2 | 131.1   | 934.9  | 1224.8 |
| CTV         | 174.0   | 3390.5 | 3782.6 | 3655.4  | 3632.7 | 88.7   |
| lung        | 2281.2  | 20.4   | 3768.9 | 904.4   | 1153.2 | 1104.5 |
| esophagus   | 33.6    | 38.1   | 3670.1 | 1595.8  | 1721.2 | 1521.1 |
| heart       | 810.3   | 12.7   | 3631.2 | 120.6   | 377.1  | 619.4  |
| PTV         | 448.6   | 3299.1 | 3785.4 | 3619.8  | 3600.0 | 100.0  |

## Case 9

Case 9 (3D CRT)

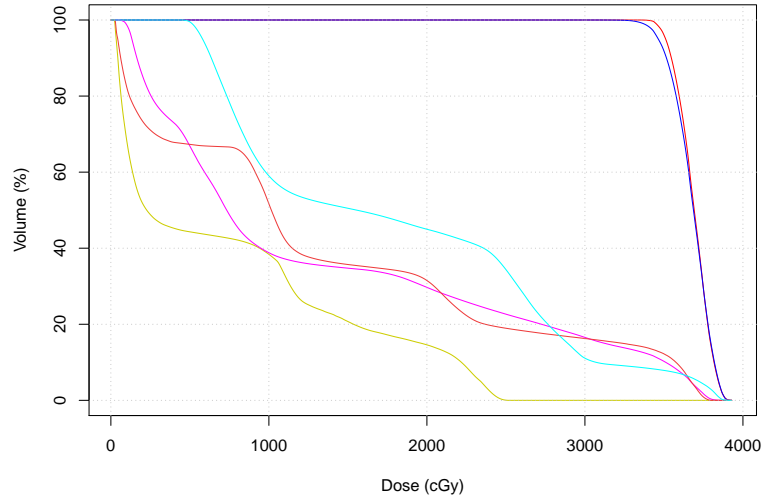

| Structure   | V [cm3] | Dmin   | Dmax   | Dmedian | Dmean  | Dstd   |
|-------------|---------|--------|--------|---------|--------|--------|
| CTV         | 606.5   | 3348.6 | 3929.4 | 3691.8  | 3686.8 | 101.1  |
| PTV         | 968.2   | 2961.4 | 3929.4 | 3687.0  | 3675.9 | 116.4  |
| spinal cord | 59.7    | 18.4   | 2516.9 | 227.1   | 758.4  | 817.1  |
| lung        | 3798.8  | 55.1   | 3887.8 | 733.2   | 1328.2 | 1225.3 |
| esophagus   | 49.6    | 26.2   | 3800.1 | 1015.6  | 1364.1 | 1221.0 |
| heart       | 980.1   | 437.6  | 3911.1 | 1556.7  | 1779.8 | 1047.3 |

Case 9 (DCAT)

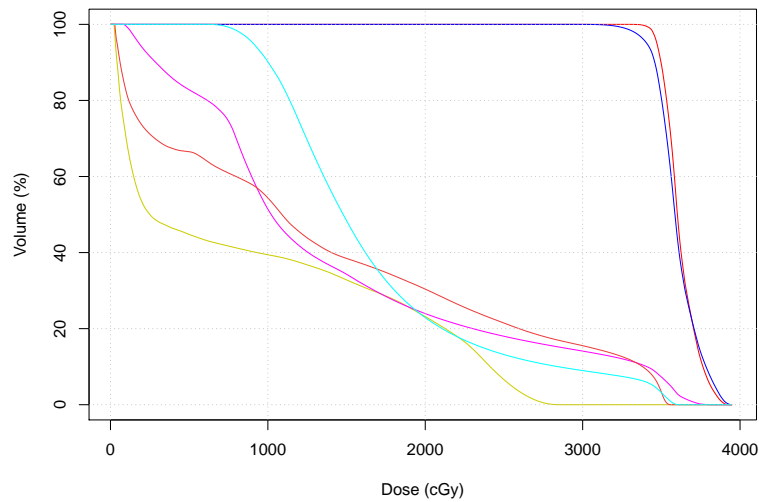

| Structure   | V [cm3] | Dmin   | Dmax   | Dmedian | Dmean  | Dstd   |
|-------------|---------|--------|--------|---------|--------|--------|
| CTV         | 606.5   | 3287.6 | 3931.4 | 3602.0  | 3618.1 | 101.4  |
| PTV         | 968.2   | 2935.9 | 3947.5 | 3586.5  | 3600.0 | 129.3  |
| spinal cord | 59.7    | 20.9   | 2849.2 | 250.1   | 910.3  | 970.9  |
| lung        | 3798.8  | 80.5   | 3852.7 | 1021.0  | 1412.7 | 1038.7 |
| esophagus   | 49.6    | 26.4   | 3557.5 | 1089.4  | 1357.3 | 1182.9 |
| heart       | 980.1   | 592.4  | 3617.2 | 1478.7  | 1683.3 | 705.9  |

## Case 10

Case 10 (3D CRT)

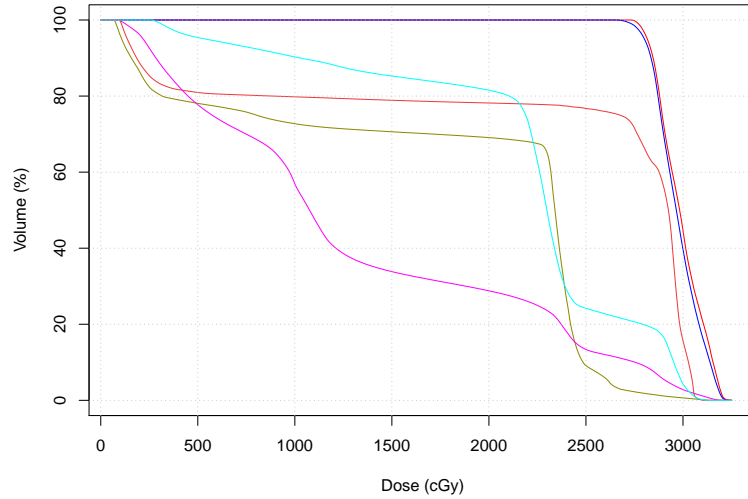

| Structure        | V [cm3] | Dmin   | Dmax   | Dmedian | Dmean  | Dstd   |
|------------------|---------|--------|--------|---------|--------|--------|
| CTV              | 370.5   | 2723.7 | 3251.4 | 2982.7  | 2988.2 | 114.4  |
| PTV              | 984.4   | 2644.4 | 3251.4 | 2965.7  | 2973.5 | 113.5  |
| spinal cord PORV | 156.9   | 67.1   | 3137.5 | 2340.4  | 1798.1 | 952.8  |
| lung             | 3297.4  | 73.3   | 3222.2 | 1075.9  | 1329.8 | 889.3  |
| esophagus        | 37.7    | 96.3   | 3112.1 | 2924.8  | 2349.6 | 1090.4 |
| heart            | 834.2   | 258.6  | 3171.5 | 2298.8  | 2196.0 | 670.3  |

Case 10 (DCAT)

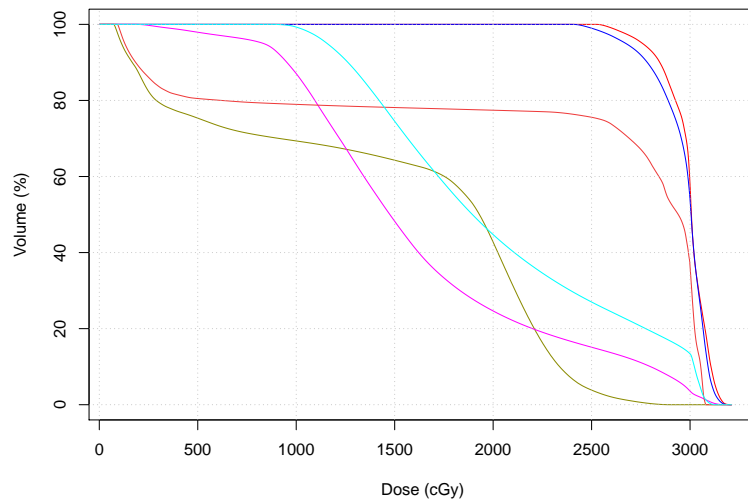

| Structure        | V [cm3] | Dmin   | Dmax   | Dmedian | Dmean  | Dstd   |
|------------------|---------|--------|--------|---------|--------|--------|
| CTV              | 370.5   | 2524.7 | 3211.9 | 3006.9  | 2990.3 | 110.1  |
| PTV              | 984.4   | 2398.1 | 3211.9 | 3005.2  | 2968.3 | 133.3  |
| spinal cord PORV | 156.9   | 73.5   | 2896.8 | 1930.2  | 1510.9 | 853.6  |
| lung             | 3297.4  | 180.2  | 3191.2 | 1475.6  | 1633.7 | 662.3  |
| esophagus        | 37.7    | 89.2   | 3082.5 | 2940.0  | 2338.8 | 1108.3 |
| heart            | 834.2   | 867.6  | 3132.2 | 1894.7  | 2023.8 | 632.9  |

## Case 11

Case 11 (3D CRT)

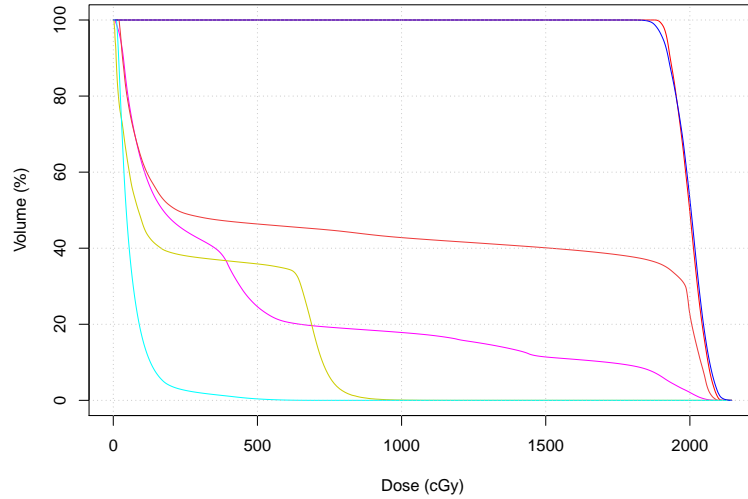

| Structure   | V [cm3] | Dmin   | Dmax   | Dmedian | Dmean  | Dstd  |
|-------------|---------|--------|--------|---------|--------|-------|
| CTV         | 377.9   | 1875.1 | 2123.1 | 1999.3  | 1998.3 | 47.9  |
| lung        | 3275.1  | 3.5    | 2106.0 | 172.3   | 466.6  | 603.1 |
| esophagus   | 38.0    | 19.5   | 2097.3 | 221.3   | 906.0  | 913.8 |
| spinal cord | 59.0    | 1.7    | 1171.3 | 86.7    | 291.1  | 315.2 |
| heart       | 599.4   | 9.7    | 699.8  | 44.9    | 66.0   | 69.0  |
| PTV         | 661.3   | 1801.7 | 2145.3 | 2004.0  | 2000.0 | 53.8  |

Case 11 (DCAT)

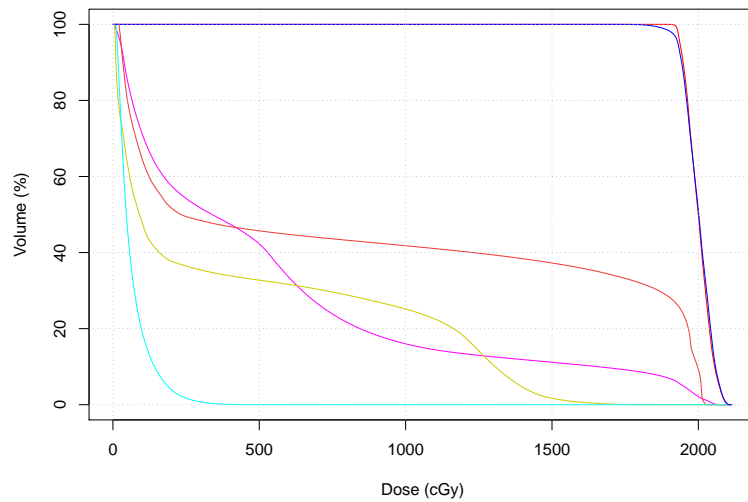

| Structure   | V [cm3] | Dmin   | Dmax   | Dmedian | Dmean  | Dstd  |
|-------------|---------|--------|--------|---------|--------|-------|
| CTV         | 377.9   | 1894.7 | 2113.3 | 1999.8  | 2000.8 | 40.4  |
| lung        | 3275.1  | 2.9    | 2091.8 | 339.1   | 536.0  | 579.3 |
| esophagus   | 38.0    | 19.7   | 2027.1 | 232.7   | 857.6  | 868.2 |
| spinal cord | 59.0    | 3.9    | 1815.3 | 90.6    | 429.6  | 537.1 |
| heart       | 599.4   | 8.1    | 472.0  | 45.9    | 65.8   | 57.5  |
| PTV         | 661.3   | 1740.0 | 2114.2 | 2001.4  | 2000.0 | 46.1  |

## Case 12

Case 12 (3D CRT)

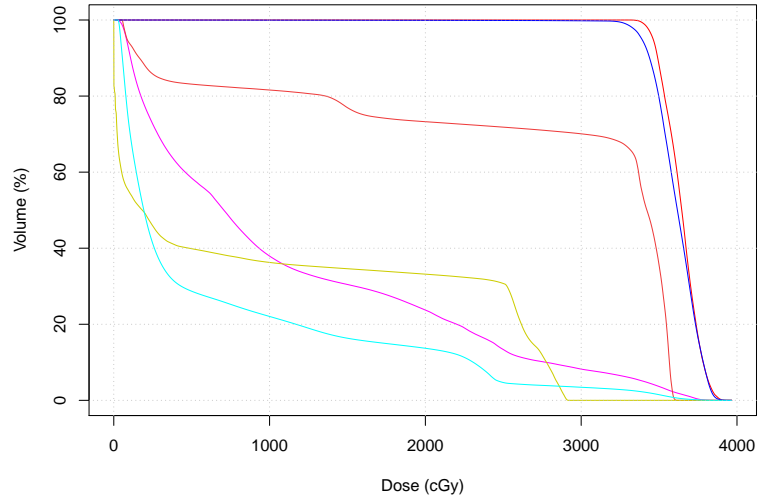

| Structure   | V [cm3] | Dmin   | Dmax   | Dmedian | Dmean  | Dstd   |
|-------------|---------|--------|--------|---------|--------|--------|
| CTV         | 139.7   | 3314.5 | 3929.2 | 3645.6  | 3640.0 | 109.4  |
| lung        | 5413.8  | 19.3   | 3934.0 | 706.6   | 1106.8 | 1062.7 |
| esophagus   | 35.8    | 53.5   | 3612.2 | 3421.7  | 2677.1 | 1305.1 |
| spinal cord | 84.7    | 0.0    | 2924.3 | 183.1   | 1001.4 | 1212.2 |
| PTV         | 641.9   | 0.0    | 3966.6 | 3617.5  | 3609.8 | 154.0  |
| heart       | 802.6   | 26.6   | 3856.7 | 192.9   | 636.6  | 900.0  |

Case 12 (DCAT)

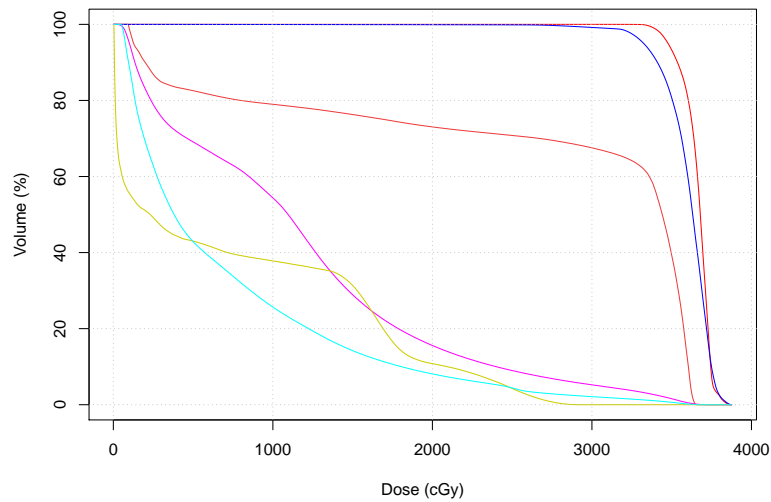

| Structure   | V [cm3] | Dmin   | Dmax   | Dmedian | Dmean  | Dstd   |
|-------------|---------|--------|--------|---------|--------|--------|
| CTV         | 139.7   | 3118.6 | 3869.7 | 3679.4  | 3660.7 | 87.0   |
| lung        | 5413.8  | 18.9   | 3757.3 | 1095.7  | 1150.1 | 885.6  |
| esophagus   | 35.8    | 91.9   | 3658.0 | 3440.9  | 2652.8 | 1326.6 |
| spinal cord | 84.7    | 2.7    | 2924.8 | 231.8   | 773.7  | 885.5  |
| PTV         | 641.9   | 5.0    | 3876.6 | 3631.5  | 3600.0 | 166.7  |
| heart       | 802.6   | 46.7   | 3692.4 | 380.6   | 711.4  | 760.2  |

## Case 13

Case 13 (3D CRT)

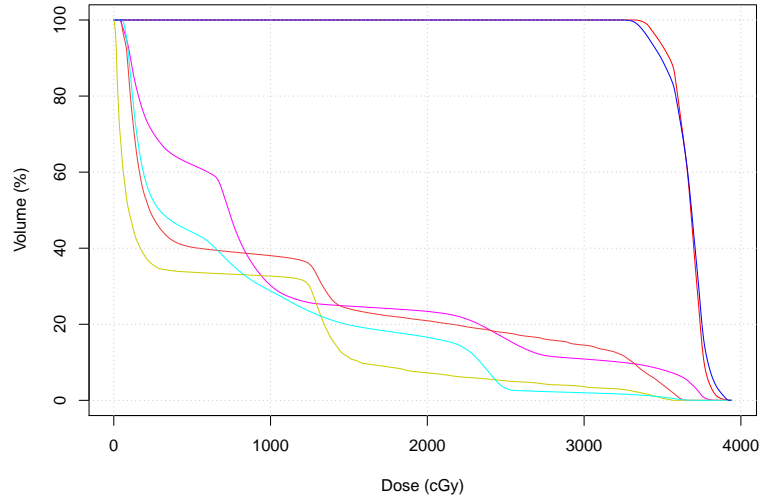

| Structure   | V [cm3] | Dmin   | Dmax   | Dmedian | Dmean  | Dstd   |
|-------------|---------|--------|--------|---------|--------|--------|
| CTV         | 581.5   | 3321.8 | 3934.5 | 3680.2  | 3665.7 | 93.6   |
| lung        | 4344.2  | 33.4   | 3884.5 | 733.0   | 1098.1 | 1131.8 |
| esophagus   | 31.7    | 44.2   | 3672.9 | 229.0   | 998.3  | 1202.1 |
| spinal cord | 87.3    | 0.0    | 3589.6 | 95.0    | 616.8  | 868.4  |
| heart       | 413.9   | 44.5   | 3701.2 | 292.0   | 784.3  | 876.3  |
| PTV         | 1043.9  | 3213.6 | 3941.9 | 3685.3  | 3664.0 | 117.6  |

Case 13 (DCAT)

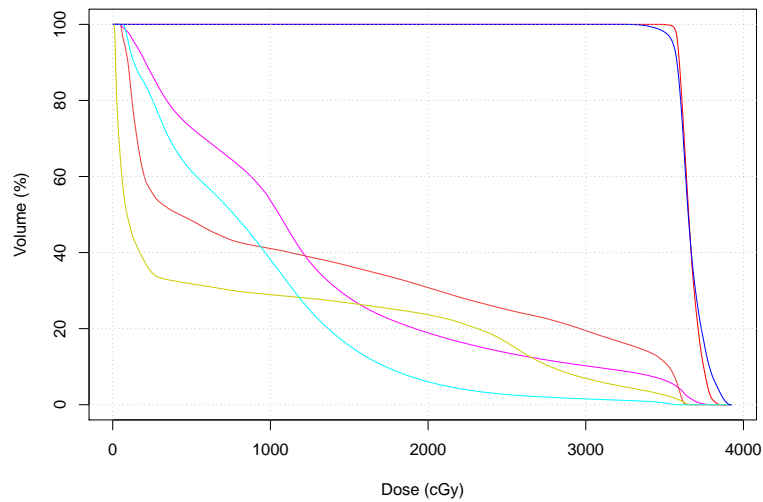

| Structure   | V [cm3] | Dmin   | Dmax   | Dmedian | Dmean  | Dstd   |
|-------------|---------|--------|--------|---------|--------|--------|
| CTV         | 581.5   | 3465.4 | 3861.0 | 3652.8  | 3661.6 | 58.3   |
| lung        | 4344.2  | 31.3   | 3827.4 | 1056.2  | 1255.4 | 996.9  |
| esophagus   | 31.7    | 47.2   | 3641.6 | 424.8   | 1248.2 | 1338.1 |
| spinal cord | 87.3    | 6.7    | 3667.5 | 91.0    | 811.3  | 1169.3 |
| heart       | 413.9   | 59.4   | 3575.3 | 769.9   | 869.8  | 677.5  |
| PTV         | 1043.9  | 3212.5 | 3925.8 | 3649.6  | 3664.2 | 85.5   |

## Case 14

Case 14 (3D CRT)

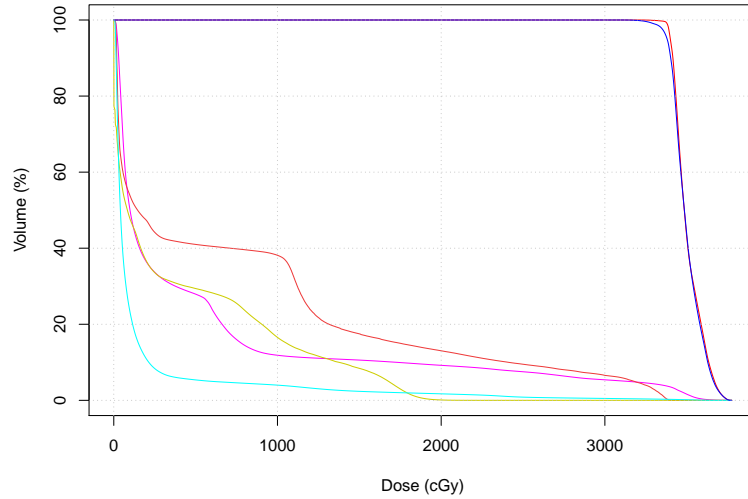

| Structure   | V [cm3] | Dmin   | Dmax   | Dmedian | Dmean  | Dstd  |
|-------------|---------|--------|--------|---------|--------|-------|
| CTV         | 331.6   | 3231.5 | 3775.2 | 3485.1  | 3506.9 | 84.8  |
| lung        | 4225.6  | 0.0    | 3734.8 | 99.2    | 500.7  | 882.1 |
| esophagus   | 43.7    | 5.7    | 3406.4 | 145.6   | 757.3  | 985.3 |
| spinal cord | 74.8    | 0.0    | 2254.0 | 83.2    | 395.1  | 554.9 |
| heart       | 1209.8  | 4.6    | 3676.0 | 40.4    | 148.0  | 408.1 |
| PTV         | 535.6   | 3101.1 | 3775.2 | 3485.7  | 3500.0 | 89.8  |

Case 14 (DCAT)

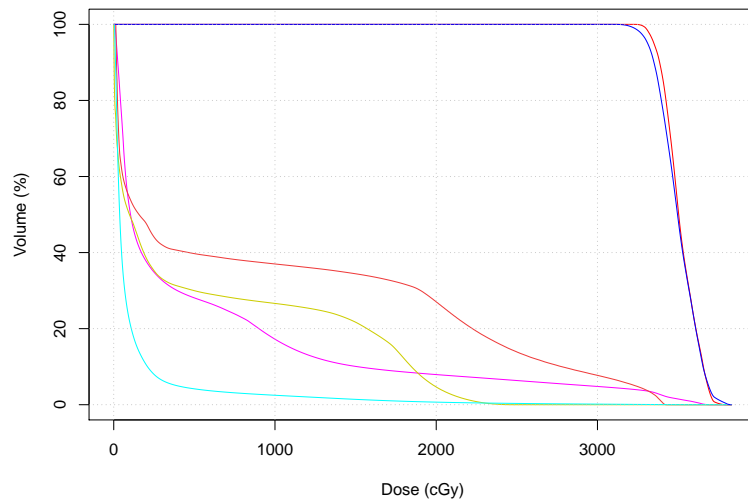

| Structure   | V [cm3] | Dmin   | Dmax   | Dmedian | Dmean  | Dstd   |
|-------------|---------|--------|--------|---------|--------|--------|
| CTV         | 331.6   | 3235.0 | 3797.0 | 3503.7  | 3513.0 | 101.3  |
| lung        | 4225.6  | 1.9    | 3723.5 | 104.0   | 521.7  | 856.3  |
| esophagus   | 43.7    | 12.0   | 3426.3 | 156.8   | 946.5  | 1163.6 |
| spinal cord | 74.8    | 0.2    | 2483.1 | 97.4    | 542.8  | 754.6  |
| heart       | 1209.8  | 2.7    | 3582.8 | 36.9    | 116.3  | 300.4  |
| PTV         | 535.6   | 3086.1 | 3833.0 | 3496.5  | 3500.0 | 117.8  |

## Case 15

Case 15 (3D CRT)

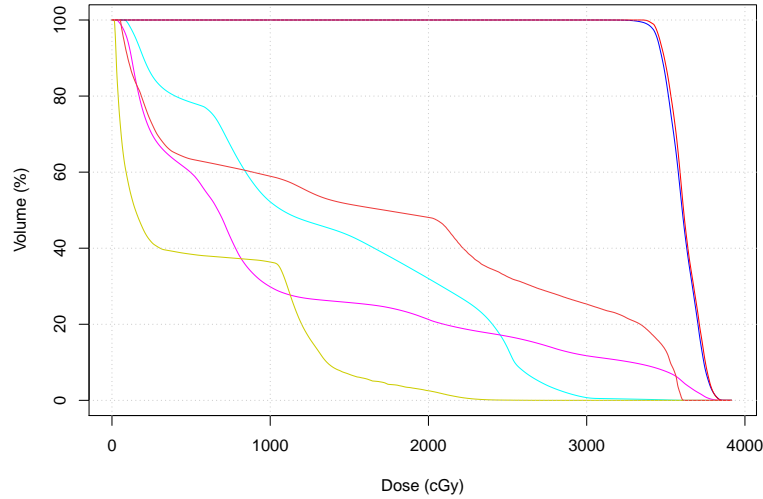

| Structure   | V [cm3] | Dmin   | Dmax   | Dmedian | Dmean  | Dstd   |
|-------------|---------|--------|--------|---------|--------|--------|
| heart       | 439.9   | 77.4   | 3625.3 | 1074.7  | 1349.2 | 900.3  |
| PTV         | 748.8   | 3102.7 | 3895.2 | 3603.6  | 3606.9 | 101.2  |
| lung        | 3667.8  | 29.1   | 3916.8 | 669.4   | 1080.1 | 1134.9 |
| spinal cord | 75.9    | 11.4   | 2746.2 | 148.5   | 555.6  | 626.1  |
| CTV         | 354.7   | 3356.8 | 3860.3 | 3612.2  | 3618.5 | 96.4   |
| esophagus   | 33.4    | 51.7   | 3615.5 | 1723.1  | 1670.2 | 1342.1 |

Case 15 (DCAT)

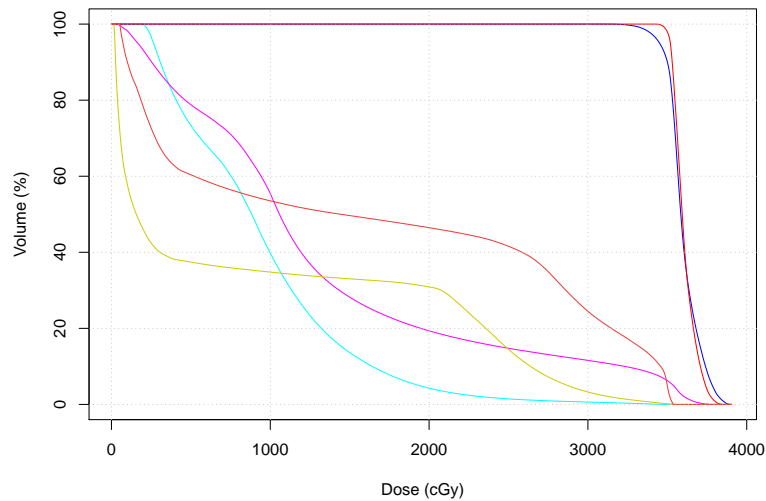

| Structure   | V [cm3] | Dmin   | Dmax   | Dmedian | Dmean  | Dstd   |
|-------------|---------|--------|--------|---------|--------|--------|
| heart       | 439.9   | 183.4  | 3478.0 | 883.0   | 934.4  | 545.3  |
| PTV         | 748.8   | 3092.3 | 3905.9 | 3584.8  | 3600.0 | 99.6   |
| lung        | 3667.8  | 32.6   | 3800.0 | 1057.6  | 1311.5 | 984.5  |
| spinal cord | 75.9    | 14.5   | 3583.1 | 156.4   | 922.6  | 1135.9 |
| CTV         | 354.7   | 3413.1 | 3845.9 | 3593.9  | 3606.9 | 68.8   |
| esophagus   | 33.4    | 50.4   | 3553.7 | 1443.3  | 1639.3 | 1365.5 |

## Case 16

Case 16 (3D CRT)

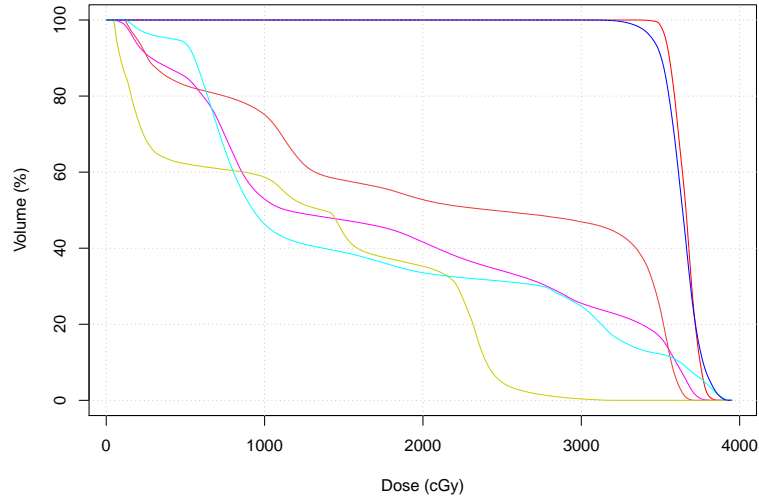

| Structure   | V [cm3] | Dmin   | Dmax   | Dmedian | Dmean  | Dstd   |
|-------------|---------|--------|--------|---------|--------|--------|
| CTV         | 343.5   | 3347.8 | 3892.0 | 3661.0  | 3655.4 | 73.4   |
| lung        | 2331.0  | 51.3   | 3880.5 | 1140.2  | 1749.0 | 1262.1 |
| esophagus   | 30.5    | 117.5  | 3719.4 | 2435.7  | 2173.5 | 1331.4 |
| spinal cord | 29.8    | 47.6   | 3215.0 | 1364.9  | 1253.2 | 959.2  |
| heart       | 581.7   | 114.0  | 3950.2 | 928.4   | 1634.4 | 1216.2 |
| PTV         | 779.8   | 2863.6 | 3948.2 | 3639.4  | 3635.0 | 109.9  |

Case 16 (DCAT)

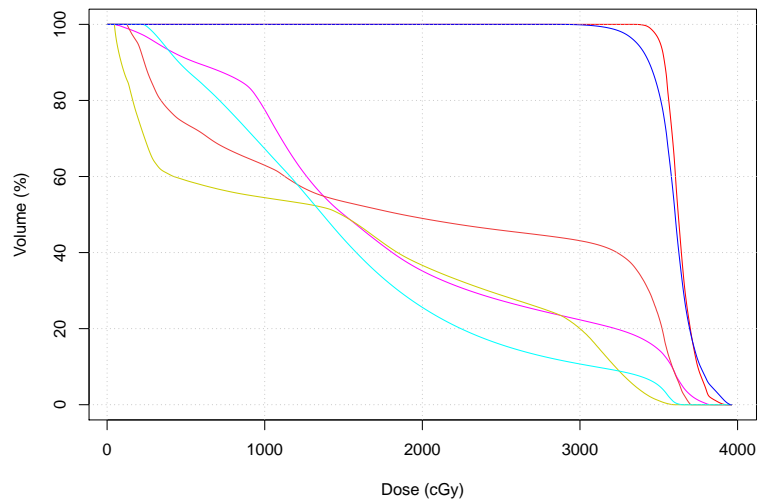

| Structure   | V [cm3] | Dmin   | Dmax   | Dmedian | Dmean  | Dstd   |
|-------------|---------|--------|--------|---------|--------|--------|
| CTV         | 343.5   | 3342.0 | 3933.8 | 3623.5  | 3632.6 | 84.5   |
| lung        | 2331.0  | 42.3   | 3863.9 | 1500.7  | 1826.0 | 1078.9 |
| esophagus   | 30.5    | 121.4  | 3705.2 | 1870.7  | 1990.7 | 1412.3 |
| spinal cord | 29.8    | 44.5   | 3599.2 | 1484.6  | 1464.0 | 1249.6 |
| heart       | 581.7   | 220.4  | 3654.9 | 1367.3  | 1534.3 | 912.2  |
| PTV         | 779.8   | 2782.2 | 3963.1 | 3603.7  | 3600.0 | 136.9  |

## Case 17

Case 17 (3D CRT)

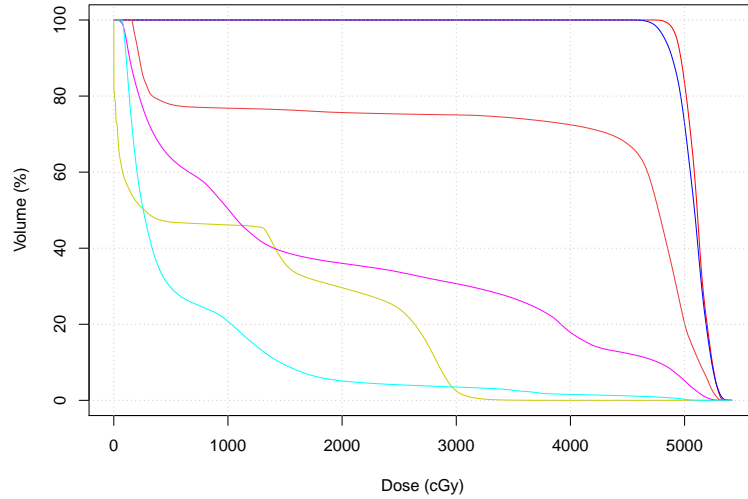

| Structure   | V [cm3] | Dmin   | Dmax   | Dmedian | Dmean  | Dstd   |
|-------------|---------|--------|--------|---------|--------|--------|
| CTV         | 246.8   | 4721.5 | 5362.6 | 5110.2  | 5105.3 | 102.9  |
| PTV         | 696.9   | 4434.9 | 5413.2 | 5086.4  | 5072.7 | 133.1  |
| spinal cord | 70.0    | 0.0    | 3798.4 | 268.8   | 1088.2 | 1180.6 |
| lung        | 3709.6  | 15.7   | 5337.8 | 1009.2  | 1814.5 | 1760.9 |
| esophagus   | 21.5    | 156.3  | 5323.8 | 4770.8  | 3713.4 | 1957.0 |
| heart       | 643.8   | 69.2   | 5187.0 | 258.5   | 606.7  | 837.3  |

Case 17 (DCAT)

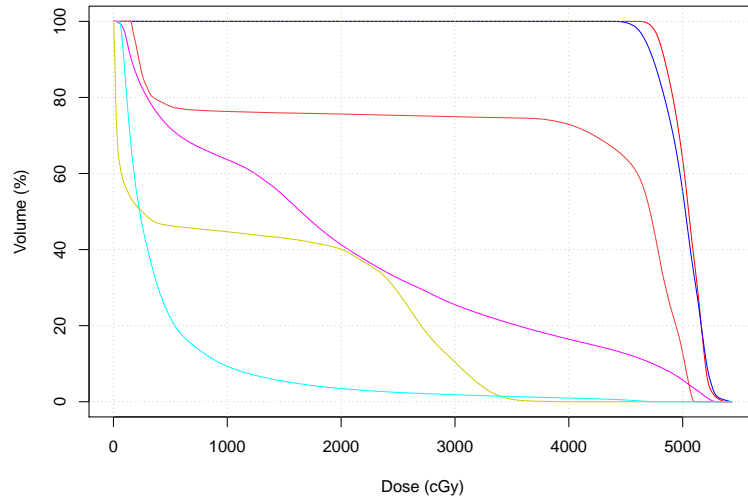

| Structure   | V [cm3] | Dmin   | Dmax   | Dmedian | Dmean  | Dstd   |
|-------------|---------|--------|--------|---------|--------|--------|
| CTV         | 246.8   | 4608.4 | 5382.2 | 5052.3  | 5037.8 | 136.2  |
| PTV         | 696.9   | 4291.9 | 5431.2 | 5023.8  | 5000.0 | 178.8  |
| spinal cord | 70.0    | 3.0    | 4075.7 | 251.5   | 1216.2 | 1306.6 |
| lung        | 3709.6  | 16.8   | 5369.6 | 1644.7  | 1957.4 | 1619.9 |
| esophagus   | 21.5    | 151.4  | 5109.1 | 4713.3  | 3648.7 | 1926.2 |
| heart       | 643.8   | 55.1   | 4757.2 | 230.3   | 445.1  | 646.6  |

## Case 18

Case 18 (3D CRT)

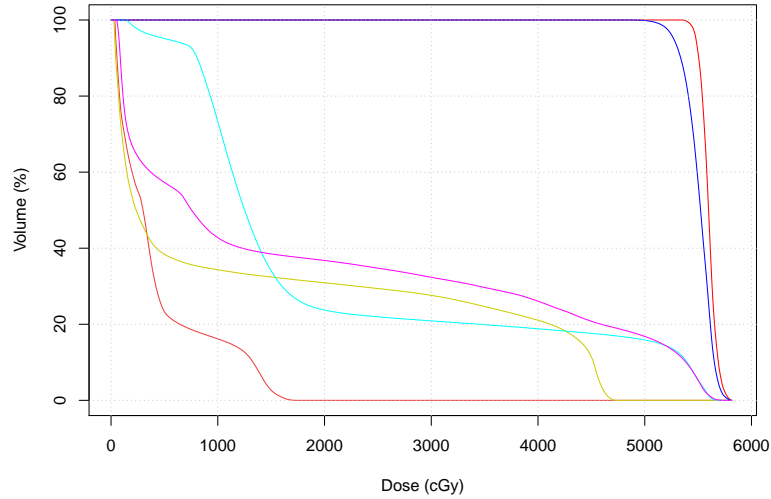

| Structure   | V [cm3] | Dmin   | Dmax   | Dmedian | Dmean  | Dstd   |
|-------------|---------|--------|--------|---------|--------|--------|
| CTV         | 256.8   | 5331.5 | 5815.3 | 5598.0  | 5597.5 | 71.7   |
| esophagus   | 21.7    | 34.2   | 1755.1 | 299.7   | 433.4  | 448.6  |
| spinal cord | 44.4    | 25.6   | 4740.0 | 235.0   | 1420.8 | 1826.2 |
| heart       | 714.8   | 121.5  | 5730.8 | 1251.5  | 1989.5 | 1674.0 |
| PTV         | 595.2   | 4800.8 | 5815.3 | 5523.0  | 5507.3 | 127.8  |
| lung        | 2890.3  | 44.1   | 5746.7 | 755.1   | 1914.0 | 2097.0 |

Case 18 (DCAT)

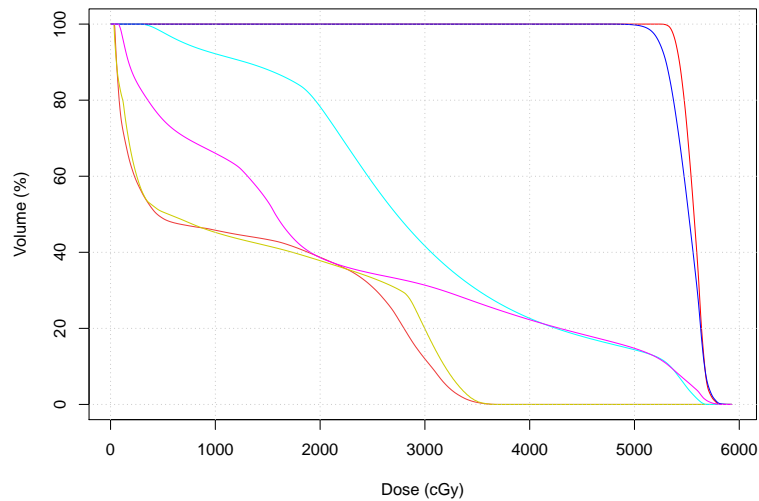

| Structure   | V [cm3] | Dmin   | Dmax   | Dmedian | Dmean  | Dstd   |
|-------------|---------|--------|--------|---------|--------|--------|
| CTV         | 256.8   | 5237.7 | 5824.5 | 5567.6  | 5559.1 | 93.7   |
| esophagus   | 21.7    | 35.4   | 3743.4 | 445.1   | 1296.4 | 1275.8 |
| spinal cord | 44.4    | 30.7   | 3676.0 | 553.5   | 1351.9 | 1330.2 |
| heart       | 714.8   | 281.0  | 5691.4 | 2729.1  | 2980.9 | 1379.8 |
| PTV         | 595.2   | 4752.0 | 5928.6 | 5517.0  | 5500.0 | 147.2  |
| lung        | 2890.3  | 61.1   | 5883.8 | 1573.2  | 2172.5 | 1852.7 |

## Case 19

Case 19 (3D CRT)

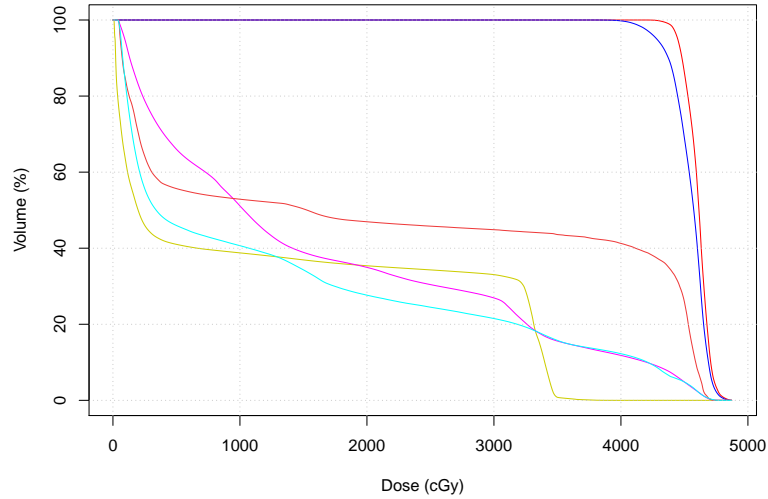

| Structure   | V [cm3] | Dmin   | Dmax   | Dmedian | Dmean  | Dstd   |
|-------------|---------|--------|--------|---------|--------|--------|
| CTV         | 148.8   | 4204.8 | 4872.9 | 4614.4  | 4603.9 | 89.1   |
| PTV         | 403.7   | 3760.2 | 4872.9 | 4573.5  | 4545.4 | 135.7  |
| spinal cord | 72.1    | 6.5    | 3964.0 | 198.3   | 1289.9 | 1512.6 |
| lung        | 4500.7  | 26.1   | 4819.1 | 1031.3  | 1633.5 | 1506.7 |
| esophagus   | 31.4    | 44.2   | 4737.9 | 1529.2  | 2219.8 | 2048.6 |
| heart       | 711.3   | 36.3   | 4795.3 | 340.3   | 1334.8 | 1564.0 |

Case 19 (DCAT)

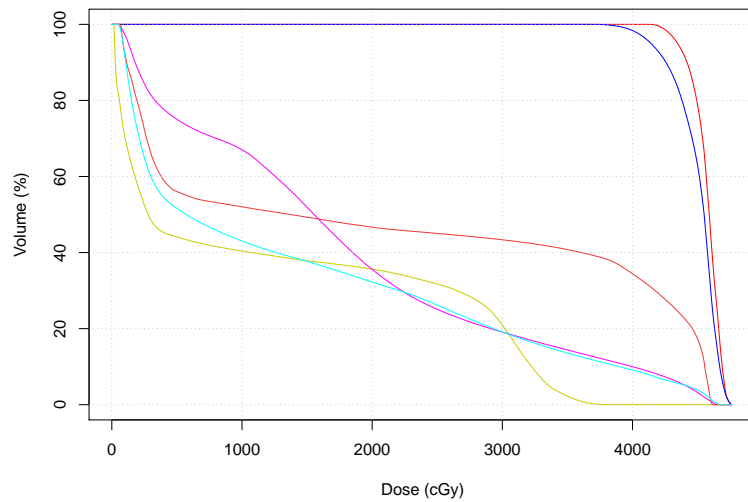

| Structure   | V [cm3] | Dmin   | Dmax   | Dmedian | Dmean  | Dstd   |
|-------------|---------|--------|--------|---------|--------|--------|
| CTV         | 148.8   | 4091.8 | 4761.8 | 4589.8  | 4569.9 | 108.7  |
| PTV         | 403.7   | 3676.9 | 4762.5 | 4550.0  | 4500.0 | 170.3  |
| spinal cord | 72.1    | 15.1   | 3831.0 | 279.4   | 1240.9 | 1370.9 |
| lung        | 4500.7  | 40.5   | 4724.6 | 1554.4  | 1744.3 | 1329.3 |
| esophagus   | 31.4    | 62.3   | 4628.8 | 1374.2  | 2137.1 | 1941.6 |
| heart       | 711.3   | 50.9   | 4681.9 | 573.1   | 1398.7 | 1479.1 |

## Case 20

Case 20 (3D CRT)

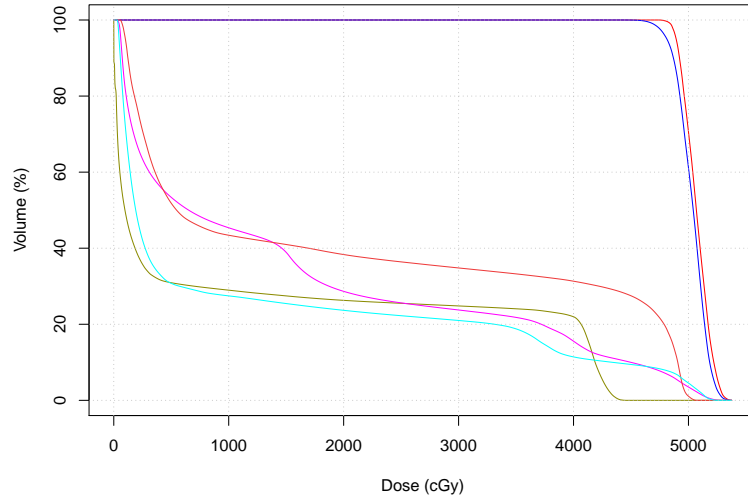

| Structure        | V [cm3] | Dmin   | Dmax   | Dmedian | Dmean  | Dstd   |
|------------------|---------|--------|--------|---------|--------|--------|
| CTV              | 227.7   | 4741.6 | 5376.8 | 5068.9  | 5070.0 | 112.2  |
| PTV              | 576.9   | 4415.9 | 5376.8 | 5041.7  | 5031.0 | 126.9  |
| spinal cord PORV | 193.5   | 0.0    | 4456.1 | 97.3    | 1167.7 | 1745.6 |
| lung             | 4808.8  | 12.4   | 5339.9 | 651.8   | 1534.7 | 1702.6 |
| esophagus        | 88.4    | 56.7   | 5072.7 | 546.7   | 1949.8 | 2048.8 |
| heart            | 610.7   | 30.4   | 5266.3 | 191.1   | 1151.2 | 1709.1 |

Case 20 (DCAT)

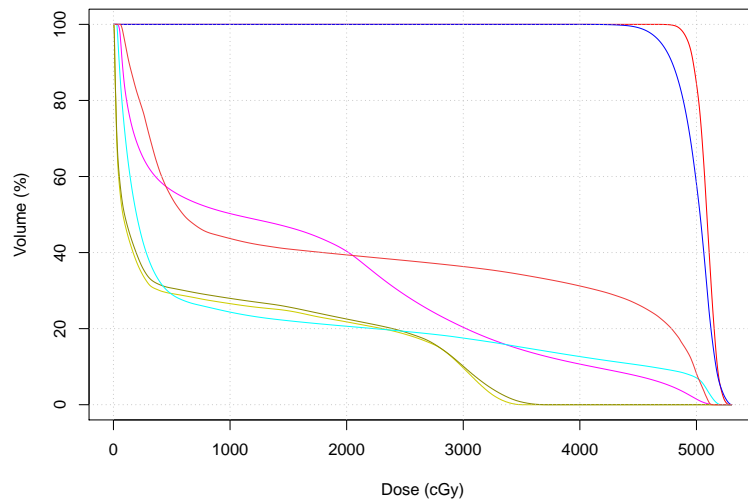

| Structure        | V [cm3] | Dmin   | Dmax   | Dmedian | Dmean  | Dstd   |
|------------------|---------|--------|--------|---------|--------|--------|
| lung             | 4808.8  | 27.5   | 5195.0 | 1034.2  | 1593.5 | 1572.5 |
| CTV              | 227.7   | 4669.0 | 5283.6 | 5089.1  | 5082.1 | 82.3   |
| spinal cord      | 63.9    | 3.7    | 3515.3 | 81.1    | 778.3  | 1176.9 |
| spinal cord PORV | 193.5   | 2.8    | 3733.5 | 95.3    | 815.9  | 1198.0 |
| heart            | 610.7   | 28.1   | 5218.6 | 197.9   | 1063.5 | 1679.8 |
| PTV              | 576.9   | 3992.8 | 5302.8 | 5030.7  | 5000.0 | 156.0  |
| esophagus        | 88.4    | 57.8   | 5136.2 | 599.4   | 2004.8 | 2053.6 |

## Case 21

Case 21 (3D CRT)

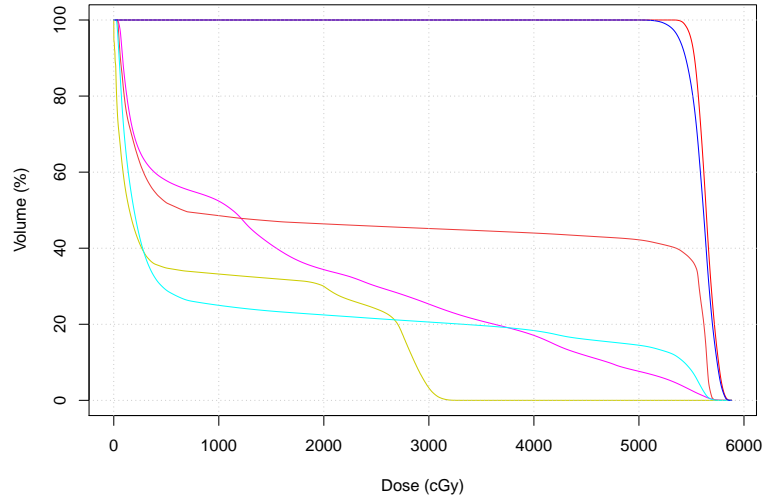

| Structure   | V [cm3] | Dmin   | Dmax   | Dmedian | Dmean  | Dstd   |
|-------------|---------|--------|--------|---------|--------|--------|
| CTV         | 245.5   | 5305.4 | 5883.9 | 5639.8  | 5640.3 | 87.4   |
| lung        | 3276.1  | 26.5   | 5851.2 | 1129.8  | 1711.7 | 1784.6 |
| esophagus   | 31.5    | 35.3   | 5737.1 | 658.9   | 2640.1 | 2619.3 |
| spinal cord | 45.9    | 0.0    | 3348.4 | 149.2   | 939.5  | 1207.6 |
| heart       | 539.9   | 23.6   | 5775.8 | 193.2   | 1263.6 | 2004.1 |
| PTV         | 429.2   | 4967.9 | 5883.9 | 5613.6  | 5601.1 | 118.6  |

Case 21 (DCAT)

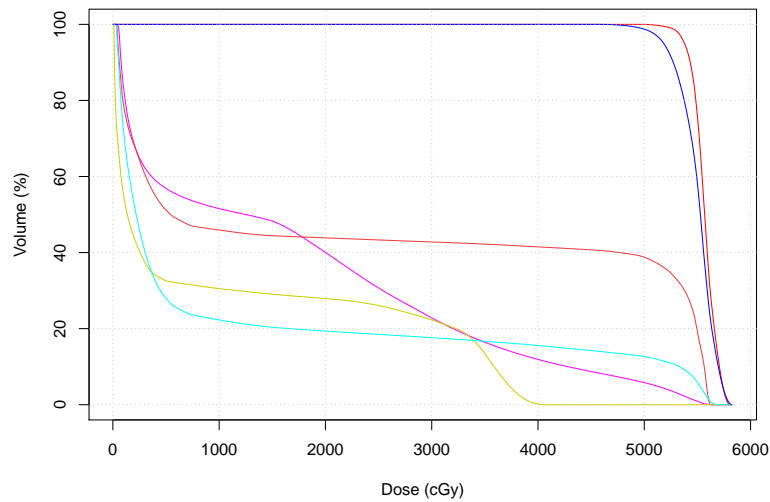

| Structure   | V [cm3] | Dmin   | Dmax   | Dmedian | Dmean  | Dstd   |
|-------------|---------|--------|--------|---------|--------|--------|
| CTV         | 245.5   | 4961.9 | 5814.8 | 5568.0  | 5565.4 | 109.5  |
| lung        | 3276.1  | 34.6   | 5707.6 | 1251.2  | 1678.6 | 1668.7 |
| esophagus   | 31.5    | 34.6   | 5626.8 | 543.5   | 2461.7 | 2530.3 |
| spinal cord | 45.9    | 8.5    | 4076.4 | 135.6   | 1057.0 | 1472.1 |
| heart       | 539.9   | 29.0   | 5686.7 | 219.0   | 1139.3 | 1882.5 |
| PTV         | 429.2   | 4495.6 | 5823.1 | 5527.8  | 5500.0 | 170.1  |

## Case 22

Case 22 (3D CRT)

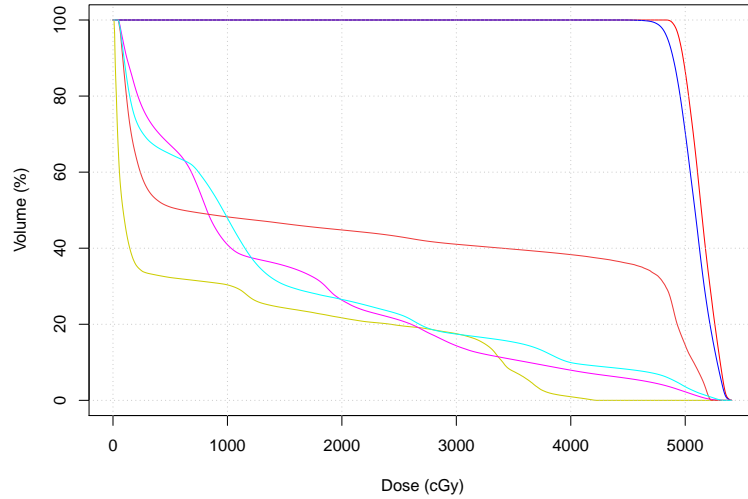

| Structure   | V [cm3] | Dmin   | Dmax   | Dmedian | Dmean  | Dstd   |
|-------------|---------|--------|--------|---------|--------|--------|
| CTV         | 152.3   | 4831.4 | 5406.8 | 5141.2  | 5142.1 | 118.9  |
| PTV         | 295.4   | 4444.0 | 5406.8 | 5085.1  | 5083.0 | 143.8  |
| spinal cord | 45.0    | 6.8    | 4225.7 | 88.0    | 898.9  | 1342.7 |
| lung        | 4509.9  | 34.2   | 5380.6 | 819.9   | 1395.1 | 1389.1 |
| esophagus   | 42.5    | 46.0   | 5232.5 | 611.3   | 2225.1 | 2244.0 |
| heart       | 843.6   | 42.1   | 5350.9 | 961.7   | 1450.5 | 1514.3 |

Case 22 (DCAT)

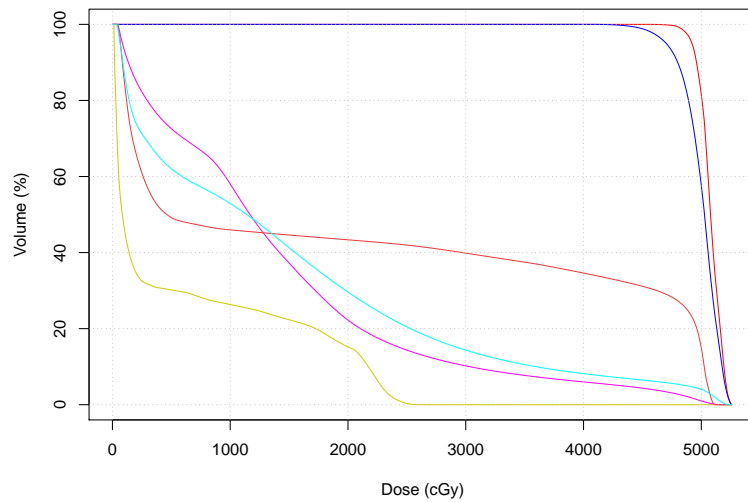

| Structure   | V [cm3] | Dmin   | Dmax   | Dmedian | Dmean  | Dstd   |
|-------------|---------|--------|--------|---------|--------|--------|
| CTV         | 152.3   | 4539.0 | 5258.6 | 5078.3  | 5076.3 | 90.9   |
| PTV         | 295.4   | 4051.2 | 5258.5 | 5027.0  | 5000.0 | 157.4  |
| spinal cord | 45.0    | 11.4   | 2607.7 | 84.0    | 597.5  | 852.2  |
| lung        | 4509.9  | 28.6   | 5214.3 | 1168.0  | 1403.0 | 1200.4 |
| esophagus   | 42.5    | 44.0   | 5117.1 | 462.5   | 2116.9 | 2187.9 |
| heart       | 843.6   | 34.5   | 5255.3 | 1140.5  | 1463.4 | 1428.1 |

## Case 23

Case 23 (3D CRT)

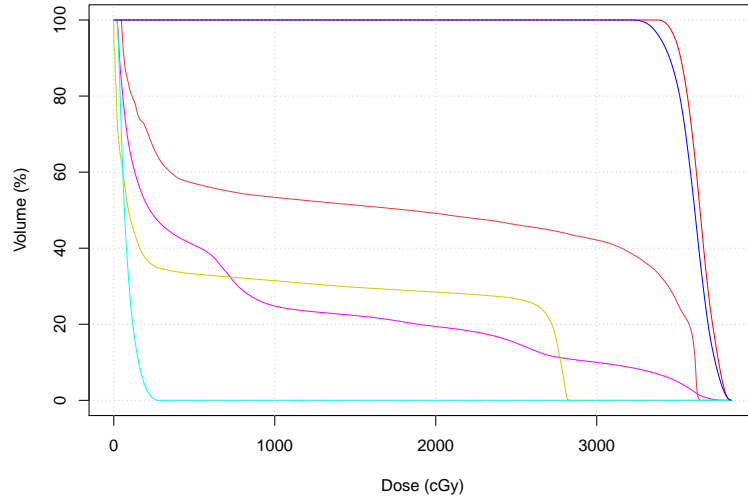

| Structure   | V [cm3] | Dmin   | Dmax   | Dmedian | Dmean  | Dstd   |
|-------------|---------|--------|--------|---------|--------|--------|
| CTV         | 151.4   | 3369.0 | 3838.7 | 3641.3  | 3639.2 | 87.8   |
| lung        | 3368.1  | 10.9   | 3811.2 | 224.6   | 850.6  | 1139.1 |
| esophagus   | 17.4    | 44.8   | 3649.0 | 1825.3  | 1809.0 | 1572.9 |
| spinal cord | 63.9    | 0.0    | 2842.6 | 91.5    | 873.4  | 1194.0 |
| heart       | 313.5   | 18.9   | 288.7  | 66.0    | 81.0   | 49.2   |
| PTV         | 319.3   | 3203.3 | 3838.7 | 3608.5  | 3600.0 | 108.4  |

Case 23 (DCAT)

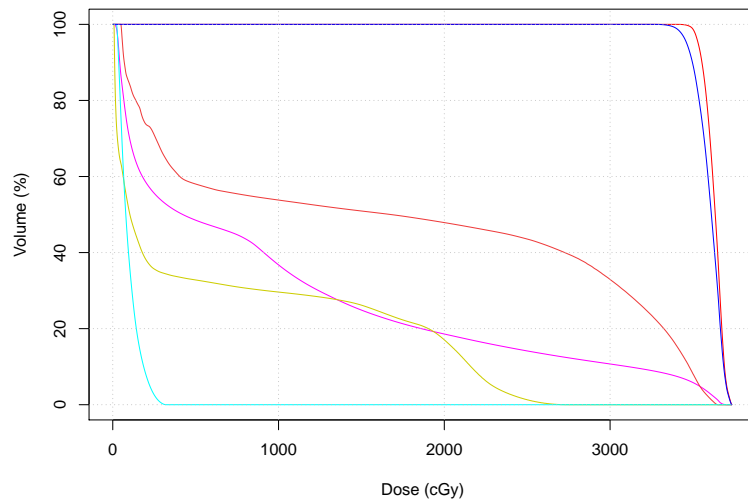

| Structure   | V [cm3] | Dmin   | Dmax   | Dmedian | Dmean  | Dstd   |
|-------------|---------|--------|--------|---------|--------|--------|
| CTV         | 151.4   | 3402.8 | 3734.1 | 3634.5  | 3627.9 | 52.6   |
| lung        | 3368.1  | 7.2    | 3713.2 | 422.5   | 977.2  | 1129.8 |
| esophagus   | 17.4    | 48.8   | 3651.4 | 1678.0  | 1696.1 | 1443.0 |
| spinal cord | 63.9    | 6.1    | 2749.0 | 103.3   | 659.8  | 889.2  |
| heart       | 313.5   | 23.0   | 330.9  | 78.6    | 96.4   | 60.1   |
| PTV         | 319.3   | 3246.1 | 3734.1 | 3611.1  | 3600.0 | 74.1   |

## Case 24

Case 24 (3D CRT)

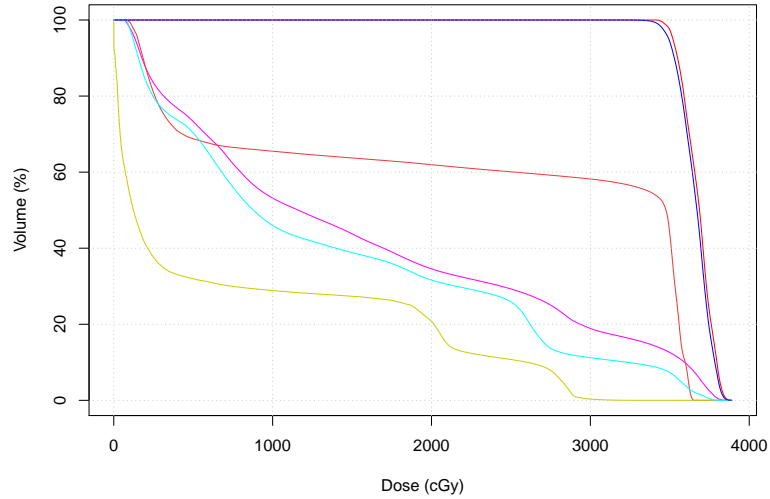

| Structure   | V [cm3] | Dmin   | Dmax   | Dmedian | Dmean  | Dstd   |
|-------------|---------|--------|--------|---------|--------|--------|
| CTV         | 314.1   | 3407.0 | 3890.1 | 3687.0  | 3676.4 | 91.6   |
| lung        | 3866.4  | 47.3   | 3881.9 | 1161.6  | 1564.1 | 1247.3 |
| esophagus   | 31.9    | 77.0   | 3653.9 | 3476.0  | 2295.1 | 1523.2 |
| spinal cord | 55.4    | 0.1    | 3292.8 | 123.8   | 738.2  | 1016.9 |
| heart       | 824.4   | 69.2   | 3802.7 | 878.9   | 1372.9 | 1152.6 |
| PTV         | 726.6   | 3211.1 | 3890.1 | 3670.9  | 3660.3 | 96.4   |

Case 24 (DCAT)

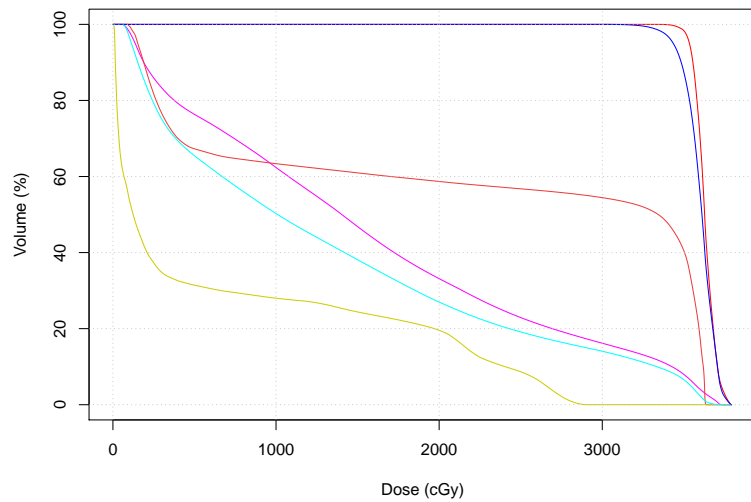

| Structure   | V [cm3] | Dmin   | Dmax   | Dmedian | Dmean  | Dstd   |
|-------------|---------|--------|--------|---------|--------|--------|
| CTV         | 314.1   | 3326.0 | 3793.7 | 3627.4  | 3629.4 | 60.0   |
| lung        | 3866.4  | 43.7   | 3758.2 | 1403.1  | 1565.9 | 1122.3 |
| esophagus   | 31.9    | 87.6   | 3638.8 | 3343.4  | 2207.5 | 1529.9 |
| spinal cord | 55.4    | 5.3    | 2906.7 | 124.1   | 693.3  | 961.1  |
| heart       | 824.4   | 59.9   | 3726.9 | 1009.8  | 1335.3 | 1135.3 |
| PTV         | 726.6   | 2996.6 | 3793.9 | 3611.0  | 3600.0 | 91.7   |

## Case 25

Case 25 (3D CRT)

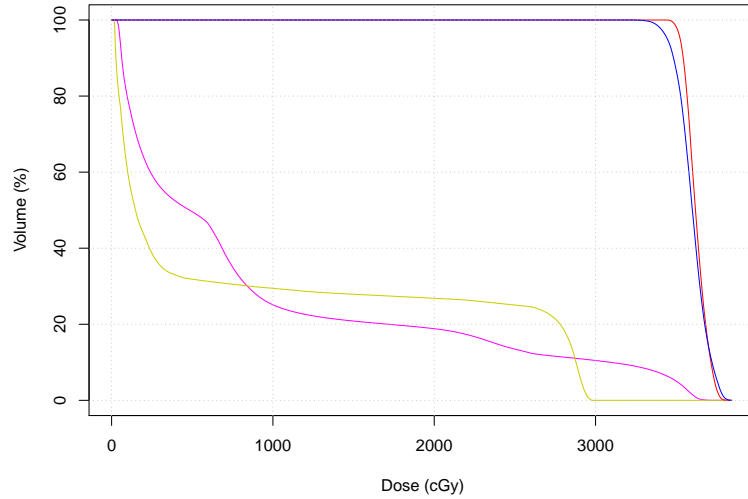

| Structure   | V [cm3] | Dmin   | Dmax   | Dmedian | Dmean  | Dstd   |
|-------------|---------|--------|--------|---------|--------|--------|
| lung        | 3311.3  | 24.0   | 3772.9 | 483.5   | 909.4  | 1093.9 |
| spinal cord | 39.3    | 13.5   | 2988.3 | 148.1   | 883.9  | 1191.7 |
| CTV         | 341.0   | 3436.5 | 3822.3 | 3619.5  | 3624.3 | 64.8   |
| PTV         | 763.9   | 3197.7 | 3844.5 | 3600.3  | 3600.1 | 91.7   |

Case 25 (DCAT)

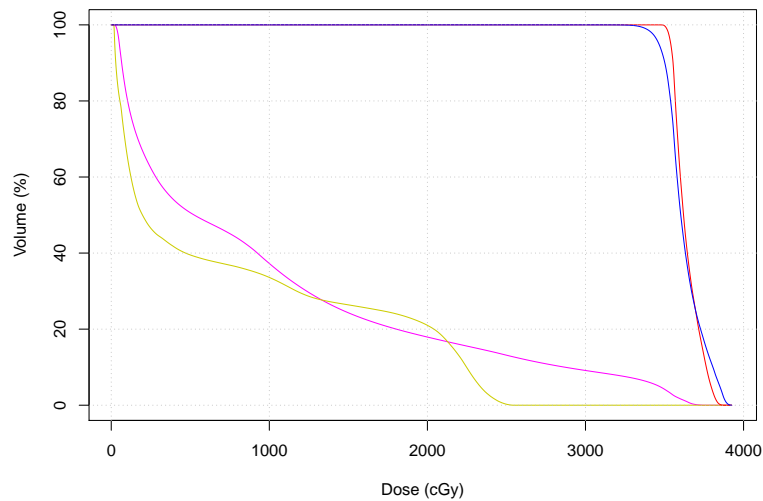

| Structure   | V [cm3] | Dmin   | Dmax   | Dmedian | Dmean  | Dstd   |
|-------------|---------|--------|--------|---------|--------|--------|
| lung        | 3311.3  | 18.6   | 3763.6 | 524.9   | 986.9  | 1069.5 |
| spinal cord | 39.3    | 16.0   | 2547.7 | 197.6   | 770.9  | 891.5  |
| CTV         | 341.0   | 3462.0 | 3873.2 | 3620.2  | 3639.9 | 80.1   |
| PTV         | 763.9   | 3085.3 | 3925.4 | 3602.7  | 3626.2 | 114.7  |

## Case 26

Case 26 (3D CRT)

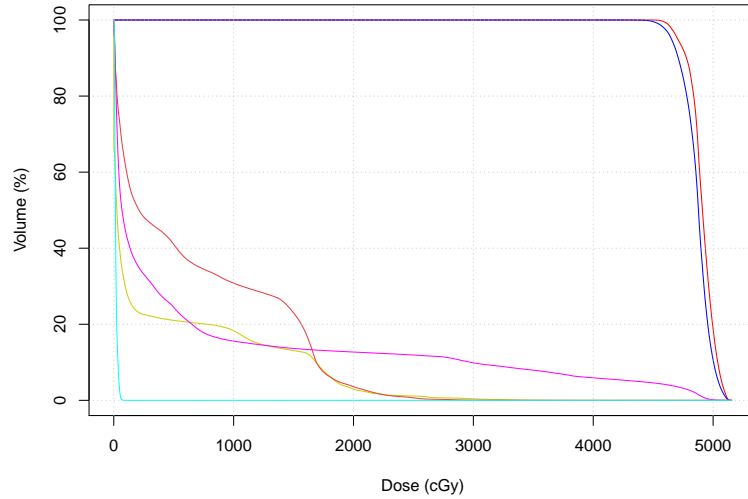

| Structure   | V [cm3] | Dmin   | Dmax   | Dmedian | Dmean  | Dstd   |
|-------------|---------|--------|--------|---------|--------|--------|
| CTV         | 98.7    | 4484.2 | 5155.7 | 4910.9  | 4908.2 | 103.9  |
| PTV         | 186.6   | 4230.6 | 5155.7 | 4877.6  | 4866.1 | 114.8  |
| spinal cord | 65.7    | 0.0    | 4020.5 | 25.5    | 362.6  | 678.3  |
| lung        | 5582.0  | 0.0    | 5155.7 | 68.4    | 657.7  | 1293.2 |
| esophagus   | 48.1    | 0.0    | 3372.1 | 211.0   | 641.6  | 725.0  |
| heart       | 500.4   | 0.5    | 101.3  | 13.7    | 17.1   | 12.0   |

Case 26 (DCAT)

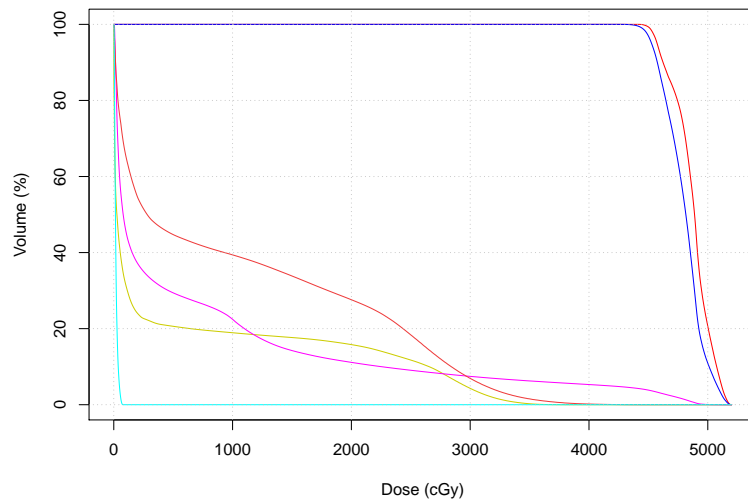

| Structure   | V [cm3] | Dmin   | Dmax   | Dmedian | Dmean  | Dstd   |
|-------------|---------|--------|--------|---------|--------|--------|
| CTV         | 98.7    | 4420.5 | 5201.9 | 4888.5  | 4870.2 | 157.1  |
| PTV         | 186.6   | 4263.7 | 5201.9 | 4815.3  | 4800.0 | 162.6  |
| spinal cord | 65.7    | 0.0    | 3809.9 | 26.3    | 531.7  | 1018.5 |
| lung        | 5582.0  | 1.9    | 5135.2 | 79.2    | 672.9  | 1197.4 |
| esophagus   | 48.1    | 2.8    | 4436.6 | 281.1   | 1030.7 | 1170.9 |
| heart       | 500.4   | 2.0    | 89.4   | 14.1    | 18.0   | 13.6   |

## Case 27

Case 27 (3D CRT)

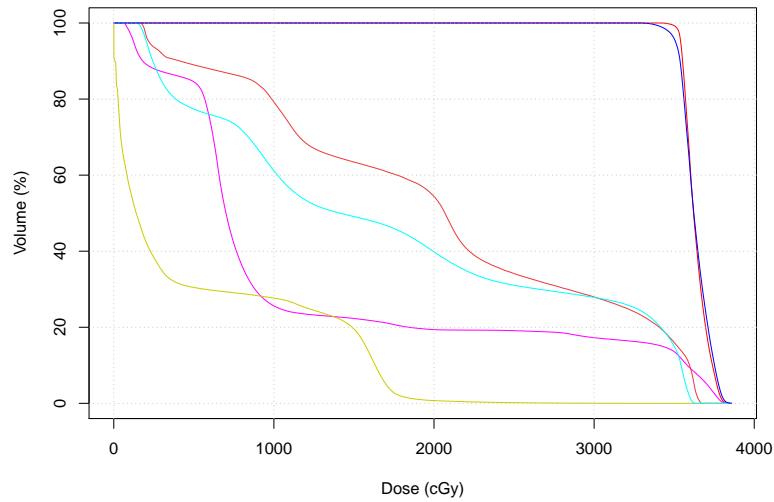

| Structure   | V [cm3] | Dmin   | Dmax   | Dmedian | Dmean  | Dstd   |
|-------------|---------|--------|--------|---------|--------|--------|
| CTV         | 1135.6  | 3413.4 | 3850.0 | 3621.0  | 3633.5 | 70.0   |
| lung        | 2399.6  | 56.8   | 3850.0 | 700.7   | 1208.8 | 1168.7 |
| esophagus   | 32.4    | 165.2  | 3671.8 | 2068.4  | 2039.8 | 1115.7 |
| spinal cord | 77.9    | 0.0    | 3274.4 | 140.3   | 522.6  | 667.9  |
| heart       | 871.0   | 139.3  | 3647.8 | 1413.0  | 1749.2 | 1246.0 |
| PTV         | 1739.6  | 3155.6 | 3859.7 | 3622.6  | 3631.8 | 85.0   |

Case 27 (DCAT)

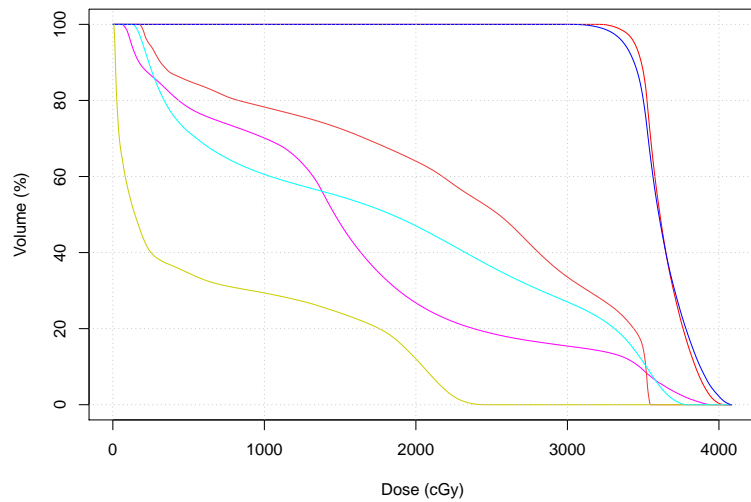

| Structure   | V [cm3] | Dmin   | Dmax   | Dmedian | Dmean  | Dstd   |
|-------------|---------|--------|--------|---------|--------|--------|
| CTV         | 1135.6  | 3186.5 | 4060.0 | 3610.8  | 3637.2 | 140.2  |
| lung        | 2399.6  | 50.5   | 3969.0 | 1464.6  | 1575.8 | 1077.9 |
| esophagus   | 32.4    | 172.4  | 3550.9 | 2546.3  | 2232.9 | 1147.0 |
| spinal cord | 77.9    | 6.1    | 2454.4 | 145.7   | 643.5  | 817.0  |
| heart       | 871.0   | 122.5  | 3791.3 | 1838.5  | 1792.9 | 1280.5 |
| PTV         | 1739.6  | 2972.9 | 4084.7 | 3603.0  | 3630.0 | 171.4  |

## Case 28

Case 28 (3D CRT)

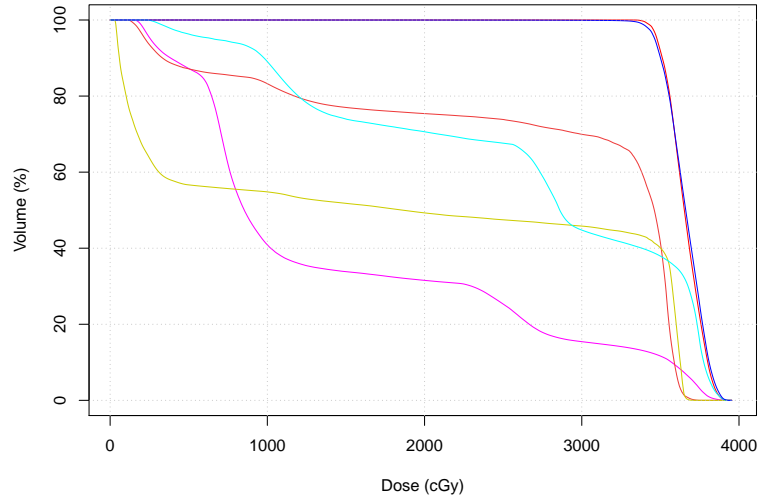

| Structure   | V [cm3] | Dmin   | Dmax   | Dmedian | Dmean  | Dstd   |
|-------------|---------|--------|--------|---------|--------|--------|
| CTV         | 1928.2  | 3319.4 | 3937.7 | 3652.4  | 3655.5 | 108.1  |
| lung        | 5341.6  | 109.3  | 3917.6 | 853.4   | 1473.9 | 1150.8 |
| esophagus   | 63.2    | 111.4  | 3763.1 | 3461.5  | 2752.0 | 1230.7 |
| spinal cord | 82.9    | 23.2   | 3715.0 | 1861.6  | 1877.1 | 1635.9 |
| heart       | 579.0   | 231.6  | 3954.1 | 2860.1  | 2651.0 | 1128.2 |
| PTV         | 2686.5  | 237.2  | 3943.0 | 3661.1  | 3658.1 | 123.0  |

Case 28 (DCAT)

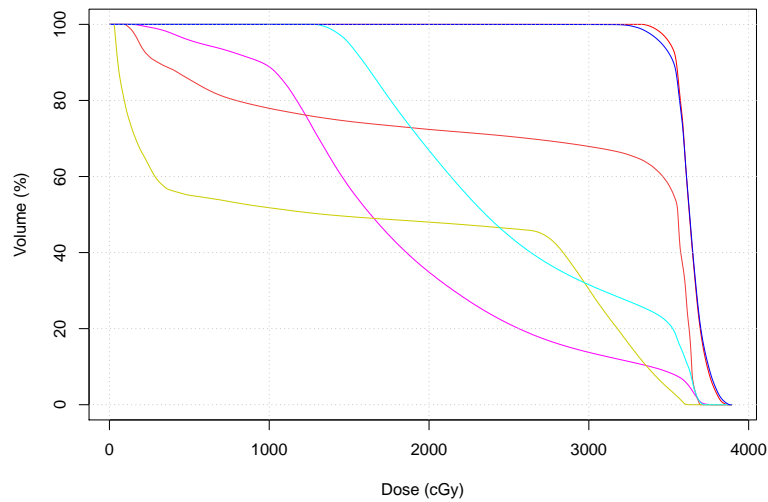

| Structure   | V [cm3] | Dmin   | Dmax   | Dmedian | Dmean  | Dstd   |
|-------------|---------|--------|--------|---------|--------|--------|
| CTV         | 1928.2  | 3329.1 | 3885.4 | 3629.2  | 3633.9 | 80.9   |
| lung        | 5341.6  | 105.6  | 3806.5 | 1634.7  | 1843.9 | 868.1  |
| esophagus   | 63.2    | 91.4   | 3699.0 | 3557.3  | 2705.6 | 1336.8 |
| spinal cord | 82.9    | 27.2   | 3635.5 | 1354.1  | 1630.3 | 1453.6 |
| heart       | 579.0   | 1269.0 | 3721.5 | 2354.8  | 2520.0 | 761.4  |
| PTV         | 2686.5  | 694.7  | 3894.4 | 3630.8  | 3629.3 | 100.8  |

## Case 29

Case 29 (3D CRT)

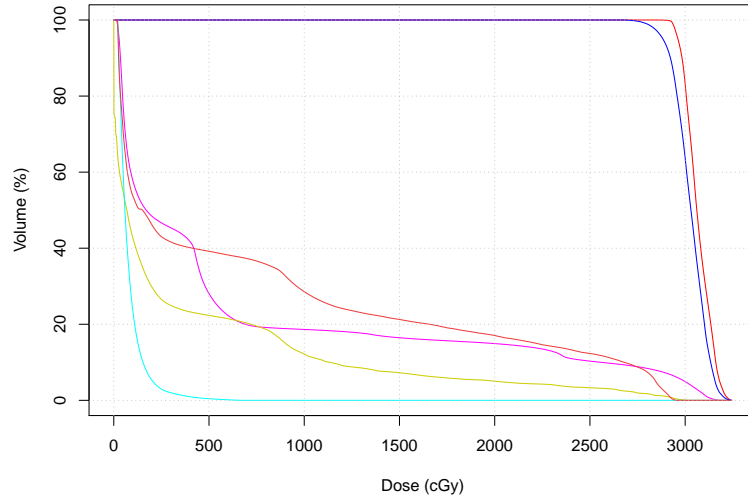

| Structure   | V [cm3] | Dmin   | Dmax   | Dmedian | Dmean  | Dstd  |
|-------------|---------|--------|--------|---------|--------|-------|
| CTV         | 173.8   | 2859.0 | 3244.7 | 3061.2  | 3067.8 | 67.8  |
| lung        | 3627.8  | 9.3    | 3218.3 | 170.4   | 637.4  | 943.6 |
| spinal cord | 59.9    | 0.0    | 3021.9 | 68.9    | 364.0  | 655.0 |
| heart       | 756.6   | 16.1   | 743.0  | 58.5    | 80.3   | 70.7  |
| PTV         | 430.1   | 2653.1 | 3244.7 | 3030.4  | 3027.3 | 84.7  |
| esophagus   | 37.2    | 19.4   | 2955.1 | 150.6   | 751.4  | 978.2 |

Case 29 (DCAT)

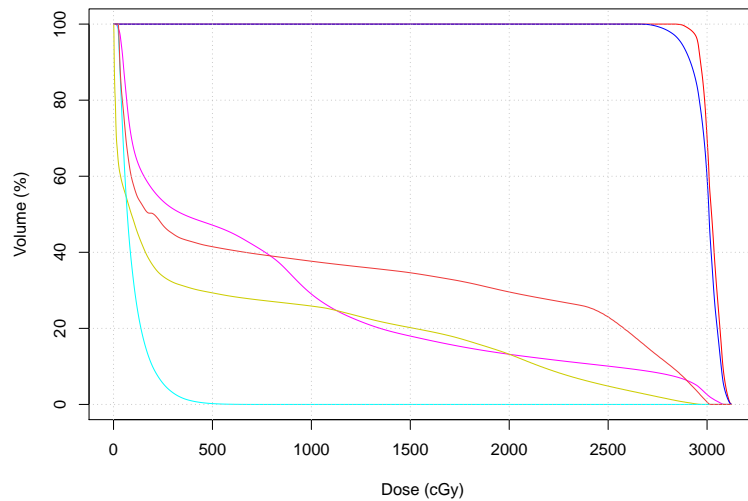

| Structure   | V [cm3] | Dmin   | Dmax   | Dmedian | Dmean  | Dstd   |
|-------------|---------|--------|--------|---------|--------|--------|
| CTV         | 173.8   | 2836.2 | 3124.9 | 3022.8  | 3023.4 | 44.3   |
| lung        | 3627.8  | 9.6    | 3101.5 | 352.2   | 784.2  | 908.1  |
| spinal cord | 59.9    | 1.2    | 2977.0 | 90.5    | 588.6  | 876.9  |
| heart       | 756.6   | 16.4   | 722.0  | 69.5    | 96.0   | 78.2   |
| PTV         | 430.1   | 2637.6 | 3124.9 | 3009.9  | 3000.0 | 65.6   |
| esophagus   | 37.2    | 24.0   | 3014.4 | 203.4   | 1001.9 | 1166.3 |

## Case 30

Case 30 (3D CRT)

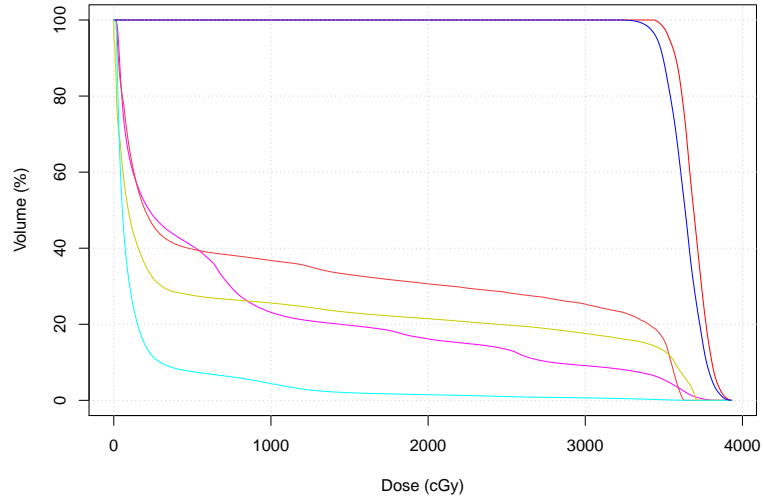

| Structure   | V [cm3] | Dmin   | Dmax   | Dmedian | Dmean  | Dstd   |
|-------------|---------|--------|--------|---------|--------|--------|
| CTV         | 195.4   | 3428.5 | 3932.1 | 3689.5  | 3690.0 | 89.4   |
| lung        | 6536.0  | 0.0    | 3882.3 | 225.7   | 797.7  | 1098.4 |
| esophagus   | 33.7    | 15.9   | 3636.9 | 199.2   | 1196.1 | 1465.8 |
| spinal cord | 48.4    | 0.0    | 3718.1 | 92.8    | 854.9  | 1359.1 |
| heart       | 790.1   | 11.5   | 3679.3 | 54.8    | 176.1  | 415.4  |
| PTV         | 499.3   | 3168.1 | 3932.1 | 3635.3  | 3633.4 | 107.8  |

Case 30 (DCAT)

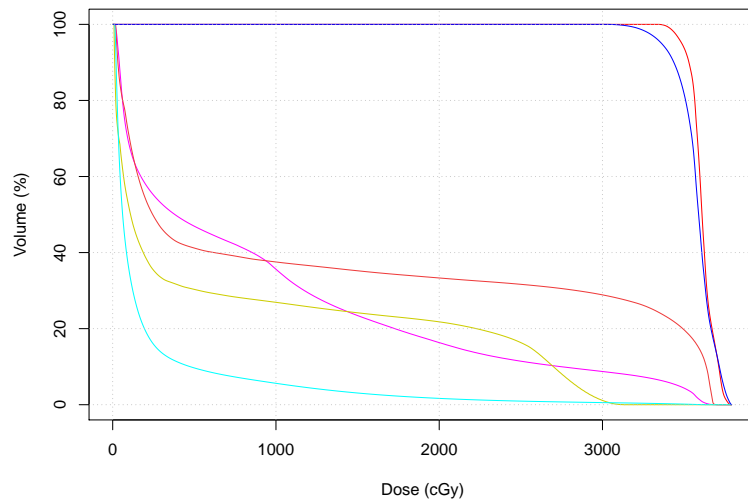

| Structure   | V [cm3] | Dmin   | Dmax   | Dmedian | Dmean  | Dstd   |
|-------------|---------|--------|--------|---------|--------|--------|
| CTV         | 195.4   | 3336.0 | 3784.8 | 3609.6  | 3612.0 | 70.9   |
| lung        | 6536.0  | 6.6    | 3721.6 | 380.9   | 909.8  | 1067.5 |
| esophagus   | 33.7    | 17.2   | 3703.2 | 245.0   | 1297.2 | 1530.7 |
| spinal cord | 48.4    | 7.7    | 3140.0 | 109.3   | 736.9  | 1067.7 |
| heart       | 790.1   | 11.2   | 3649.0 | 60.8    | 209.8  | 448.1  |
| PTV         | 499.3   | 3009.7 | 3791.9 | 3588.8  | 3578.5 | 112.1  |

## Case 31

Case 31 (3D CRT)

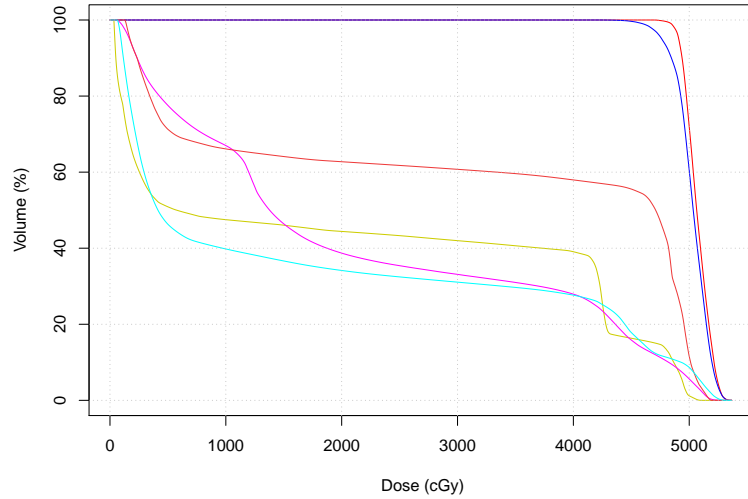

| Structure   | V [cm3] | Dmin   | Dmax   | Dmedian | Dmean  | Dstd   |
|-------------|---------|--------|--------|---------|--------|--------|
| CTV         | 342.6   | 4678.1 | 5367.4 | 5064.6  | 5070.5 | 105.4  |
| PTV         | 837.4   | 4190.8 | 5367.4 | 5034.8  | 5026.3 | 142.7  |
| spinal cord | 43.8    | 32.7   | 5103.8 | 575.6   | 2068.3 | 2079.2 |
| lung        | 3692.0  | 51.5   | 5322.9 | 1378.1  | 2137.4 | 1751.9 |
| esophagus   | 37.9    | 127.4  | 5194.0 | 4710.1  | 3135.4 | 2126.6 |
| heart       | 733.1   | 60.8   | 5316.9 | 414.1   | 1744.9 | 1981.6 |

Case 31 (DCAT)

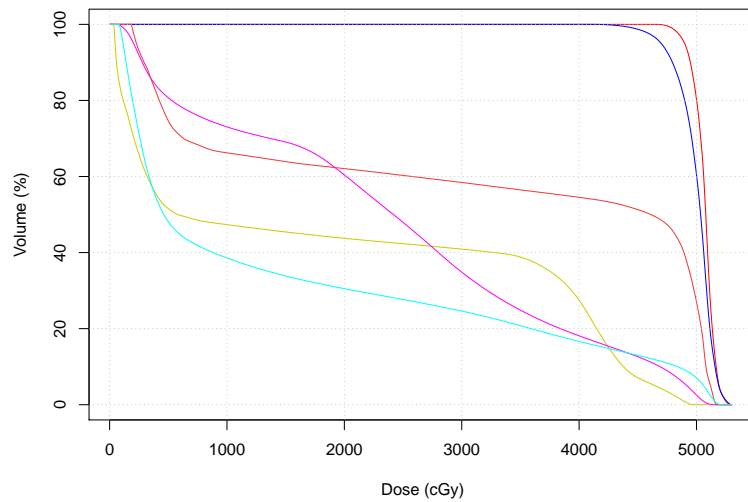

| Structure   | V [cm3] | Dmin   | Dmax   | Dmedian | Dmean  | Dstd   |
|-------------|---------|--------|--------|---------|--------|--------|
| CTV         | 342.6   | 4643.6 | 5293.4 | 5078.9  | 5066.2 | 89.5   |
| PTV         | 837.4   | 4098.0 | 5300.7 | 5035.1  | 5000.0 | 154.8  |
| spinal cord | 43.8    | 35.5   | 4968.6 | 579.8   | 1936.9 | 1909.3 |
| lung        | 3692.0  | 61.5   | 5194.4 | 2418.2  | 2373.8 | 1529.7 |
| esophagus   | 37.9    | 182.4  | 5176.9 | 4610.3  | 3118.7 | 2109.2 |
| heart       | 733.1   | 77.0   | 5214.6 | 462.0   | 1538.8 | 1766.4 |

## Case 32

Case 32 (3D CRT)

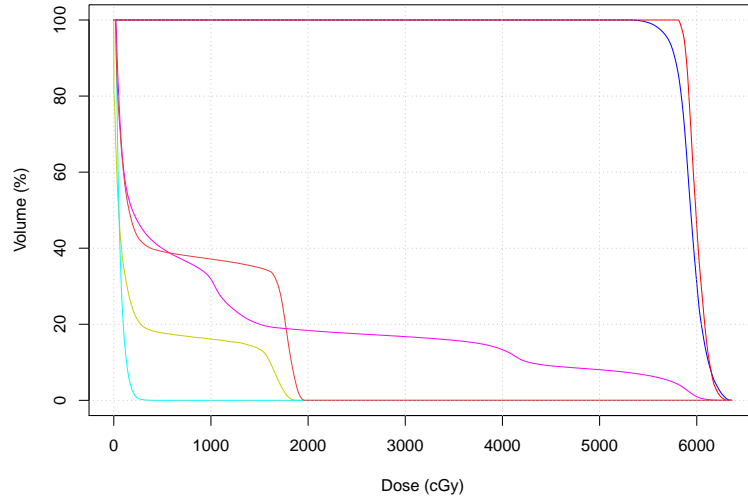

| Structure   | V [cm3] | Dmin   | Dmax   | Dmedian | Dmean  | Dstd   |
|-------------|---------|--------|--------|---------|--------|--------|
| spinal cord | 61.4    | 0.0    | 1906.4 | 50.3    | 322.9  | 579.5  |
| heart       | 520.6   | 17.1   | 451.9  | 53.1    | 68.2   | 46.1   |
| PTV         | 190.5   | 5280.5 | 6360.2 | 5937.2  | 5940.0 | 142.8  |
| lung        | 4004.7  | 12.6   | 6293.1 | 191.8   | 1151.3 | 1774.4 |
| CTV         | 50.1    | 5803.2 | 6317.2 | 5989.8  | 6001.2 | 92.9   |
| esophagus   | 32.3    | 17.3   | 1970.8 | 157.0   | 721.9  | 802.2  |

Case 32 (DCAT)

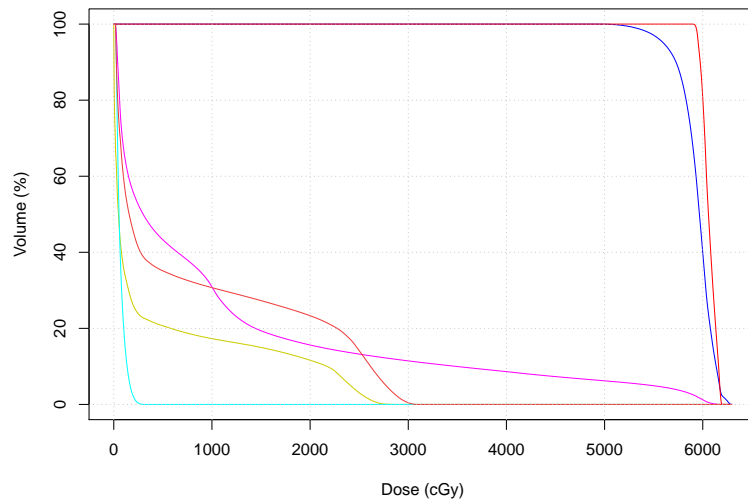

| Structure   | V [cm3] | Dmin   | Dmax   | Dmedian | Dmean  | Dstd   |
|-------------|---------|--------|--------|---------|--------|--------|
| spinal cord | 61.4    | 0.0    | 2873.4 | 47.5    | 436.6  | 799.7  |
| heart       | 520.6   | 15.5   | 334.6  | 53.7    | 69.1   | 46.2   |
| PTV         | 190.5   | 4895.3 | 6295.6 | 5966.0  | 5940.0 | 177.3  |
| lung        | 4004.7  | 9.2    | 6188.2 | 299.3   | 1037.8 | 1561.6 |
| CTV         | 50.1    | 5897.4 | 6197.3 | 6058.0  | 6063.3 | 67.7   |
| esophagus   | 32.3    | 17.4   | 3086.5 | 156.6   | 810.9  | 1048.7 |

## Case 33

Case 33 (3D CRT)

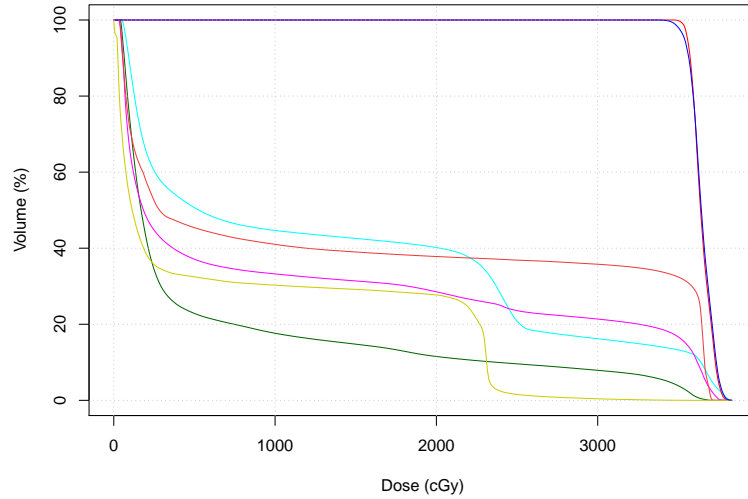

| Structure   | V [cm3] | Dmin   | Dmax   | Dmedian | Dmean  | Dstd   |
|-------------|---------|--------|--------|---------|--------|--------|
| liver       | 816.6   | 38.3   | 3724.1 | 169.4   | 612.8  | 995.5  |
| heart       | 355.0   | 45.3   | 3830.9 | 527.6   | 1357.5 | 1350.2 |
| CTV         | 404.7   | 3466.1 | 3826.4 | 3637.9  | 3645.6 | 59.2   |
| lung        | 2515.4  | 19.1   | 3806.0 | 184.4   | 1118.0 | 1432.8 |
| esophagus   | 15.0    | 35.9   | 3719.9 | 283.6   | 1495.2 | 1638.6 |
| spinal cord | 64.4    | 0.0    | 3582.7 | 114.5   | 754.2  | 1001.4 |
| PTV         | 636.3   | 3353.4 | 3831.2 | 3642.7  | 3646.4 | 67.2   |

Case 33 (DCAT)

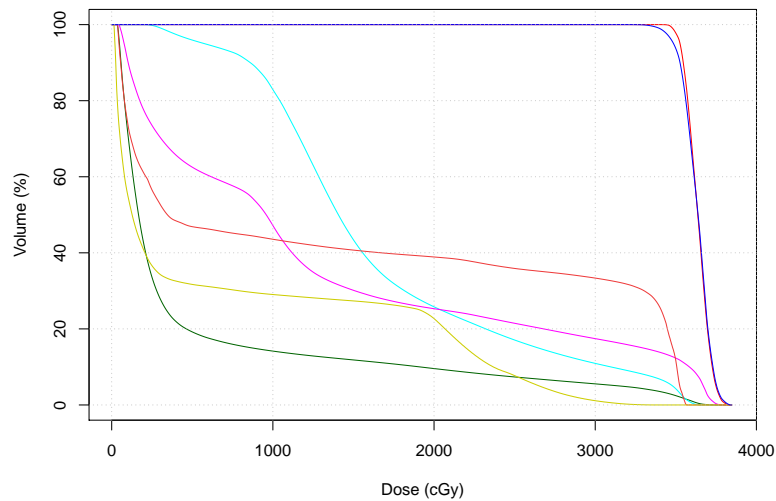

| Structure   | V [cm3] | Dmin   | Dmax   | Dmedian | Dmean  | Dstd   |
|-------------|---------|--------|--------|---------|--------|--------|
| liver       | 816.6   | 33.1   | 3761.7 | 166.5   | 522.5  | 890.0  |
| heart       | 355.0   | 210.1  | 3657.3 | 1406.5  | 1651.6 | 821.6  |
| CTV         | 404.7   | 3409.7 | 3847.2 | 3636.4  | 3635.8 | 69.0   |
| lung        | 2515.4  | 38.5   | 3788.3 | 958.7   | 1297.5 | 1233.0 |
| esophagus   | 15.0    | 35.2   | 3568.4 | 345.8   | 1454.2 | 1524.2 |
| spinal cord | 64.4    | 12.9   | 3390.9 | 126.8   | 737.0  | 998.6  |
| PTV         | 636.3   | 3213.3 | 3847.2 | 3638.0  | 3630.0 | 83.2   |

## Case 34

Case 34 (3D CRT)

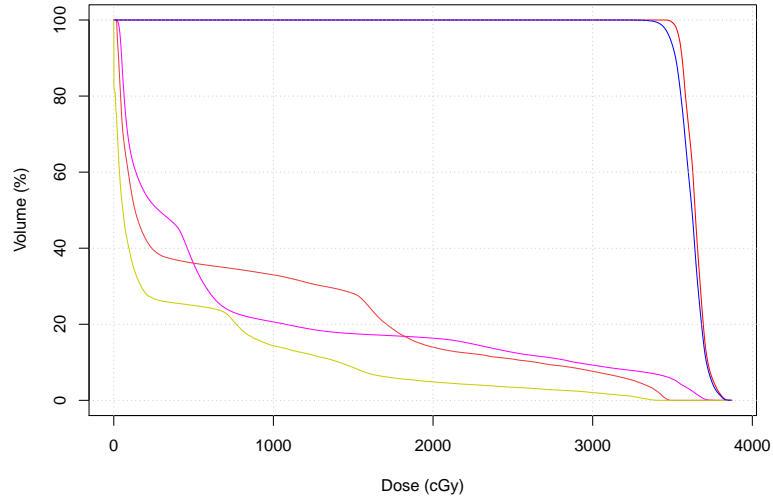

| Structure   | V [cm3] | Dmin   | Dmax   | Dmedian | Dmean  | Dstd   |
|-------------|---------|--------|--------|---------|--------|--------|
| CTV         | 299.9   | 3444.3 | 3871.2 | 3641.4  | 3641.7 | 64.6   |
| lung        | 4838.4  | 11.9   | 3802.1 | 280.9   | 761.8  | 1083.8 |
| esophagus   | 43.3    | 15.7   | 3490.8 | 133.1   | 795.7  | 1059.3 |
| spinal cord | 72.0    | 0.0    | 3421.7 | 56.9    | 396.9  | 711.2  |
| PTV         | 613.4   | 3184.6 | 3871.2 | 3621.7  | 3617.4 | 78.8   |

Case 34 (DCAT)

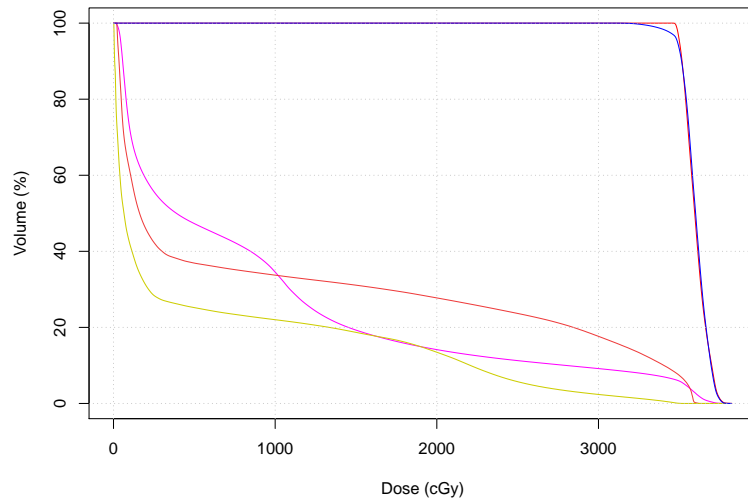

| Structure   | V [cm3] | Dmin   | Dmax   | Dmedian | Dmean  | Dstd   |
|-------------|---------|--------|--------|---------|--------|--------|
| CTV         | 299.9   | 3452.9 | 3824.5 | 3595.3  | 3601.3 | 67.3   |
| lung        | 4838.4  | 6.9    | 3797.1 | 389.1   | 886.8  | 1053.5 |
| esophagus   | 43.3    | 19.2   | 3635.9 | 161.4   | 1041.4 | 1344.9 |
| spinal cord | 72.0    | 1.7    | 3528.4 | 64.7    | 551.4  | 913.4  |
| PTV         | 613.4   | 3103.3 | 3824.5 | 3600.8  | 3600.0 | 76.6   |

## Case 35

Case 35 (3D CRT)

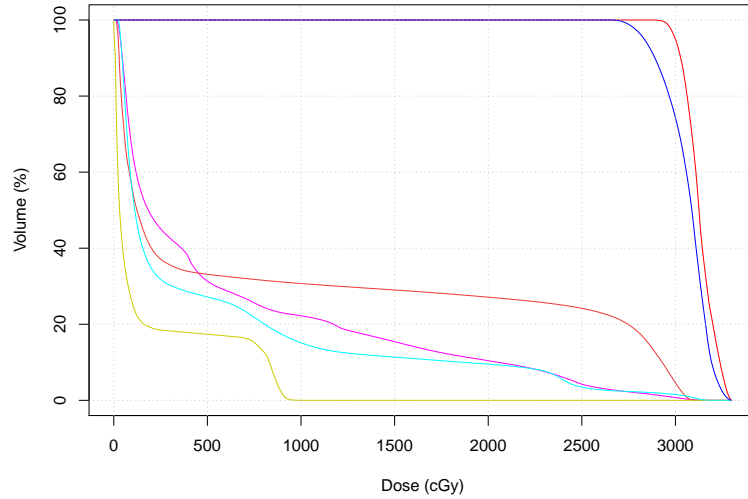

| Structure   | V [cm3] | Dmin   | Dmax   | Dmedian | Dmean  | Dstd   |
|-------------|---------|--------|--------|---------|--------|--------|
| CTV         | 29.3    | 2878.1 | 3300.8 | 3125.8  | 3128.4 | 77.3   |
| lung        | 3053.9  | 7.7    | 3215.7 | 184.4   | 599.3  | 792.5  |
| esophagus   | 35.9    | 11.6   | 3103.1 | 123.8   | 897.9  | 1209.3 |
| spinal cord | 73.5    | 0.0    | 1020.1 | 31.2    | 178.4  | 302.7  |
| heart       | 749.8   | 23.0   | 3207.2 | 112.0   | 487.9  | 759.2  |
| PTV         | 145.2   | 2628.2 | 3300.8 | 3087.6  | 3063.6 | 117.3  |

Case 35 (DCAT)

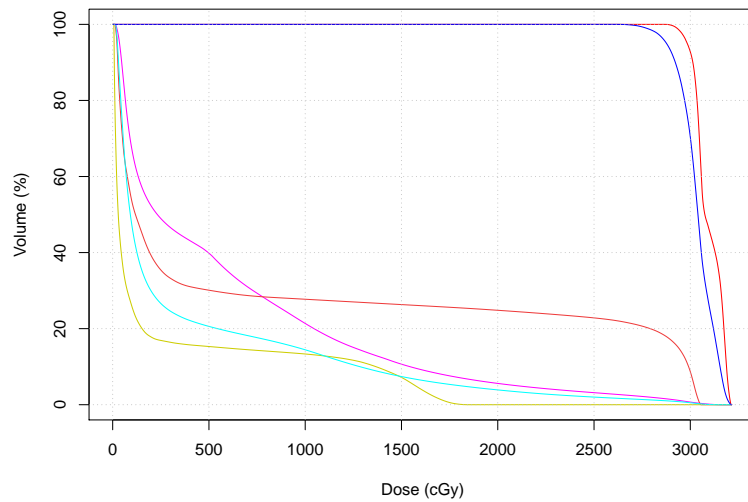

| Structure   | V [cm3] | Dmin   | Dmax   | Dmedian | Dmean  | Dstd   |
|-------------|---------|--------|--------|---------|--------|--------|
| CTV         | 29.3    | 2865.7 | 3215.4 | 3075.5  | 3095.6 | 72.0   |
| lung        | 3053.9  | 11.6   | 3179.9 | 232.0   | 576.9  | 690.7  |
| esophagus   | 35.9    | 11.3   | 3055.9 | 118.2   | 843.9  | 1205.9 |
| spinal cord | 73.5    | 5.7    | 1844.7 | 29.0    | 251.7  | 502.2  |
| heart       | 749.8   | 13.4   | 3148.7 | 91.8    | 372.5  | 617.7  |
| PTV         | 145.2   | 2614.0 | 3215.4 | 3039.7  | 3036.9 | 90.2   |
